# Supplementary material for: Lipid, fatty acid, carnitine- and choline derivative profiles in rheumatoid arthritis outpatients with different degrees of periodontal inflammation
Source: PubMed Central journal article supplement (PMC7935865; doi:10.1038/s41598-021-84122-y), 2021-03-05
Supplement: 41598_2021_84122_MOESM1_ESM.pdf [file 41598_2021_84122_MOESM1_ESM.pdf]

# **Lipid, fatty acid, carnitine- and choline derivative profiles in rheumatoid arthritis outpatients with different degrees of periodontal inflammation**

Kathrin Beyer<sup>1</sup>, Stein Atle Lie<sup>1</sup>, Bodil Bjørndal<sup>2,3</sup>, Rolf K. Berge<sup>2,4</sup>, Asbjørn Svardal<sup>2</sup>, Johan G. Brun<sup>2,5</sup>, Anne Isine Bolstad<sup>1</sup>

**1** Department of Clinical Dentistry, Faculty of Medicine, University of Bergen, Bergen, Norway.

**2** Department of Clinical Science, University of Bergen, Bergen, Norway.

**3** Department of Sport, Food and Natural Sciences, Western Norway University of Applied Sciences, Bergen, Norway.

**4** Department of Heart Disease, Haukeland University Hospital, Bergen, Norway

**5** Department of Rheumatology, Haukeland University Hospital, Bergen, Norway.

Address correspondence to:

Kathrin Beyer, Department of Clinical Dentistry, University of Bergen, Årstadveien 19, N-5009 Bergen, Norway. E-mail: [kathrin.beyer@uib.no](mailto:kathrin.beyer@uib.no). Phone: +47 55 58 65 56.

(Copy to Anne Isine Bolstad, Department of Clinical Dentistry, University of Bergen, Årstadveien 19, N-5009 Bergen, Norway. E-mail: [anne.bolstad@uib.no](mailto:anne.bolstad@uib.no). Phone: +47 55 58 66 46.)

**Supplementary Table S1.** Distribution and absolute concentration of whole blood fatty acids (FA) in rheumatoid arthritis (RA) patients ( $N = 78$ ).

|                              | Median | Range        | $N$ (%) above LOQ |
|------------------------------|--------|--------------|-------------------|
| Total FA                     | 3.09   | 2.12 - 5.45  | n.a.              |
| Unidentified FA              | 0.09   | 0.04 - 0.12  | 78 (100)          |
| C14:0, myristic acid         | 0.02   | 0.01 - 0.08  | 78 (100)          |
| C15:0, pentadecylic acid     | 0.01   | 0.005 - 0.01 | 53 (68)           |
| C16:0, palmitic acid         | 0.73   | 0.47 - 1.4   | 78 (100)          |
| C16:1                        | 0.05   | 0.02 - 0.19  | 78 (100)          |
| C16:3n-3, HTA                | 0.01   | 0.01 - 0.02  | 78 (100)          |
| C17:0, margaric acid         | 0.1    | 0.005 - 0.02 | 71 (91)           |
| C18:0, stearic acid          | 0.37   | 0.27 - 0.52  | 78 (100)          |
| C18:1                        | 0.55   | 0.3 - 1.47   | 78 (100)          |
| C18:2n-6, LA                 | 0.59   | 0.35 - 0.95  | 78 (100)          |
| C18:3n-3, ALA                | 0.02   | 0.05 - 0.05  | 78 (100)          |
| C18:4n-3, SDA                | 0.01   | 0.05 - 0.1   | 42 (54)           |
| C20:0, arachidic acid        | 0.01   | 0.005 - 0.02 | 67 (86)           |
| C20:2n-6, eicosadienoic acid | 0.01   | 0.05 - 0.02  | 76 (97)           |
| C20:3n-6, DGLA               | 0.04   | 0.01 - 0.08  | 78 (100)          |
| C20:4n-6, AA                 | 0.28   | 0.18 - 0.41  | 78 (100)          |
| C20:4n-3, ETA                | 0.005  | 0.005 - 0.01 | 3 (4)             |
| C20:5n-3, EPA                | 0.04   | 0.01 - 0.17  | 78 (100)          |
| C22:0, behenic acid          | 0.01   | 0.01 - 0.02  | 78 (100)          |
| C22:4n-6, AdA                | 0.02   | 0.005 - 0.05 | 76 (97)           |
| C22:5n-6, osbond acid        | 0.005  | 0.005 - 0.01 | 10 (8)            |
| C22:5n-3, DPA                | 0.04   | 0.03 - 0.05  | 78 (100)          |
| C22:6n-3, DHA                | 0.13   | 0.07 - 0.25  | 78 (100)          |

|                         |      |             |          |
|-------------------------|------|-------------|----------|
| C24:1n-9, nervonic acid | 0.02 | 0.01 - 0.04 | 78 (100) |
|-------------------------|------|-------------|----------|

---

Data represent median and range of FA concentration (mg/g), and N, number (% , percentage) of patients with measured FA over limit of quantification (LOQ) <0.01 mg/g. FA below LOQ: C6:0, C8:0, C10:0, C12:0, C16:2n-4, C16:4n-3, C18:3n-6, C20:3n-9, C20:3n-3, C22:1, C21:5n-3, C24:0, C24:5n-5, C24-6n-3. N.a., not applicable; HTA, hexadecatrienoic, LA, linoleic acid; ALA, alpha-linolenic acid; SDA, stearidonic acid; DGLA, dihomo-gamma-linolenic acid; AA, arachidonic acid; ETA, eicosatetraenoic acid; EPA, eicosapentaenoic acid; AdA, adrenic acid; DPA, docosapentaenoic acid; DHA, docosahexaenoic acid.

**Supplementary Table S2.** Distribution and concentration of whole blood fatty acids (FA), serum lipids and metabolites in rheumatoid arthritis (RA) patients ( $N = 78$ ) grouped by disease activity.

|                       | Total<br>( $N = 78$ ) | Remission<br>( $N = 33$ ) | Active RA<br>( $N = 45$ ) | <i>P</i> -value |
|-----------------------|-----------------------|---------------------------|---------------------------|-----------------|
| Total FA (mg)         | 3.12 ± 0.54           | 2.98 ± 0.47               | 3.22 ± 0.57               | 0.047           |
| SFA (wt%)             | 37.55 ± 1.95          | 37.93 ± 2.09              | 37.28 ± 1.81              | 0.15            |
| MUFA (wt%)            | 20.59 ± 2.60          | 20.11 ± 2.10              | 20.93 ± 2.89              | 0.17            |
| PUFA (wt%)            | 39.16 ± 2.46          | 39.17 ± 1.96              | 39.15 ± 2.79              | 0.99            |
| Unidentified FA (wt%) | 2.70 ± 0.64           | 2.80 ± 0.64               | 2.64 ± 0.63               | 0.28            |
| n-3 PUFA (wt%)        | 8.49 ± 2.25           | 8.48 ± 2.05               | 8.50 ± 2.41               | 0.96            |
| n-6 PUFA (wt%)        | 30.67 ± 2.49          | 30.68 ± 2.53              | 30.65 ± 2.49              | 0.94            |
| n-3/n-6               | 0.28 ± 0.09           | 0.28 ± 0.09               | 0.28 ± 0.09               | 0.98            |
| Omega-3 index         | 6.19 ± 2.09           | 6.16 ± 1.97               | 6.22 ± 2.20               | 0.91            |
| AA/EPA                | 7.82 ± 5.04           | 7.42 ± 4.21               | 8.11 ± 5.59               | 0.55            |
| EPA/ALA               | 3.22 ± 2.29           | 3.25 ± 2.46               | 3.19 ± 2.19               | 0.92            |
| AA/LA                 | 0.50 ± 0.11           | 0.50 ± 0.11               | 0.50 ± 0.11               | 0.90            |
| AIFA index            | 765.63 ± 195.61       | 759.88 ± 183.21           | 769.84 ± 206.17           | 0.83            |
| DNL index             | 1.27 ± 0.21           | 1.28 ± 0.25               | 1.26 ± 0.19               | 0.71            |
| Elongase C18:0/C16:0  | 0.51 ± 0.05           | 0.52 ± 0.06               | 0.50 ± 0.05               | 0.10            |
| Desaturase D5n-6      | 7.52 ± 3.06           | 8.05 ± 4.25               | 7.12 ± 1.71               | 0.19            |
| C14:0 (wt%)           | 0.86 ± 0.37           | 0.82 ± 0.37               | 0.90 ± 0.37               | 0.35            |
| C15:0 (wt%)           | 0.24 ± 0.10           | 0.21 ± 0.07               | 0.27 ± 0.10               | 0.010           |
| C16:0 (wt%)           | 23.66 ± 1.61          | 23.75 ± 1.88              | 23.60 ± 1.41              | 0.68            |
| C16:1 (wt%)           | 1.62 ± 0.56           | 1.54 ± 0.57               | 1.69 ± 0.55               | 0.25            |
| C16:3n-3 (wt%)        | 0.34 ± 0.12           | 0.31 ± 0.11               | 0.36 ± 0.11               | 0.029           |
| C17:0 (wt%)           | 0.28 ± 0.13           | 0.31 ± 0.15               | 0.25 ± 0.11               | 0.032           |

|                      |              |              |              |       |
|----------------------|--------------|--------------|--------------|-------|
| C18:0 (wt%)          | 11.92 ± 0.97 | 12.21 ± 1.03 | 11.7 ± 0.88  | 0.022 |
| C18:1 (wt%)          | 18.05 ± 2.32 | 17.67 ± 1.81 | 18.32 ± 2.62 | 0.22  |
| C18:2n-6, LA (wt%)   | 18.94 ± 2.10 | 18.93 ± 2.31 | 18.94 ± 1.95 | 0.99  |
| C18:3n-3, ALA (wt%)  | 0.61 ± 0.24  | 0.62 ± 0.25  | 0.61 ± 0.24  | 0.94  |
| C18:4n-3 (wt%)       | 0.13 ± 0.08  | 0.12 ± 0.09  | 0.14 ± 0.08  | 0.36  |
| C20:0 (wt%)          | 0.24 ± 0.08  | 0.26 ± 0.09  | 0.23 ± 0.07  | 0.038 |
| C20:1 (wt%)          | 0.18 ± 0.06  | 0.17 ± 0.06  | 0.19 ± 0.06  | 0.17  |
| C20:2n-6 (wt%)       | 0.33 ± 0.12  | 0.34 ± 0.17  | 0.31 ± 0.07  | 0.30  |
| C20:3n-6, DGLA (wt%) | 1.33 ± 0.33  | 1.30 ± 0.36  | 1.35 ± 0.31  | 0.46  |
| C20:4n-6, AA (wt%)   | 9.25 ± 1.43  | 9.25 ± 1.30  | 9.26 ± 1.54  | 0.98  |
| C20:4n-3 (wt%)       | 0.01 ± 0.05  | 0.01 ± 0.05  | 0.01 ± 0.05  | 0.91  |
| C20:5n-3, EPA (wt%)  | 1.74 ± 1.13  | 1.74 ± 1.21  | 1.74 ± 1.08  | 1     |
| C22:0 (wt%)          | 0.35 ± 0.07  | 0.37 ± 0.07  | 0.35 ± 0.07  | 0.20  |
| C22:4n-6 (wt%)       | 0.79 ± 0.29  | 0.85 ± 0.31  | 0.75 ± 0.28  | 0.15  |
| C22:5n-6 (wt%)       | 0.03 ± 0.09  | 0.02 ± 0.07  | 0.03 ± 0.10  | 0.59  |
| C22:5n-3, DPA (wt%)  | 1.21 ± 0.22  | 1.26 ± 0.21  | 1.16 ± 0.21  | 0.049 |
| C22:6n-3, DHA (wt%)  | 4.46 ± 1.08  | 4.43 ± 0.89  | 4.48 ± 1.21  | 0.83  |
| C24:1n-9 (wt%)       | 0.73 ± 0.16  | 0.73 ± 0.16  | 0.73 ± 0.17  | 0.96  |

*Lipids*

|                    |             |             |             |      |
|--------------------|-------------|-------------|-------------|------|
| TG (mmol/L)        | 1.20 ± 0.82 | 1.12 ± 0.65 | 1.26 ± 0.92 | 0.43 |
| TC (mmol/L)        | 5.52 ± 1.22 | 5.33 ± 1.02 | 5.64 ± 1.34 | 0.26 |
| HDL-C (mmol/L)     | 1.64 ± 0.50 | 1.57 ± 0.44 | 1.69 ± 0.53 | 0.30 |
| LDL-C (mmol/L)     | 3.29 ± 0.93 | 3.24 ± 0.76 | 3.33 ± 1.05 | 0.69 |
| PL (mmol/L)        | 3.04 ± 0.55 | 2.94 ± 0.48 | 3.11 ± 0.60 | 0.19 |
| NEFA (mmol/L)      | 0.51 ± 0.27 | 0.47 ± 0.21 | 0.53 ± 0.30 | 0.31 |
| HDL-C/LDL-C ratio  | 0.54 ± 0.24 | 0.51 ± 0.19 | 0.56 ± 0.27 | 0.37 |
| Non HDL-C (mmol/L) | 3.87 ± 1.15 | 3.76 ± 0.89 | 3.95 ± 1.32 | 0.46 |

|                        |                |                |                |       |
|------------------------|----------------|----------------|----------------|-------|
| Castelli's risk index  | 3.63 ± 1.36    | 3.55 ± 0.86    | 3.70 ± 1.63    | 0.63  |
| Atherogenic index      | -0.17 ± 0.30   | -0.18 ± 0.27   | -0.17 ± 0.33   | 0.91  |
| <i>Metabolites</i>     |                |                |                |       |
| Betaine (μM)           | 40.32 ± 19.30  | 38.01 ± 14.03  | 42.01 ± 22.41  | 0.37  |
| Choline (μM)           | 10.73 ± 2.46   | 10.60 ± 2.67   | 10.83 ± 2.32   | 0.68  |
| L-carnitine (μM)       | 36.66 ± 8.07   | 37.28 ± 9.51   | 36.21 ± 6.90   | 0.57  |
| GBB (μM)               | 0.91 ± 0.22    | 0.92 ± 0.25    | 0.89 ± 0.19    | 0.53  |
| TML (μM)               | 0.49 ± 0.18    | 0.45 ± 0.13    | 0.52 ± 0.20    | 0.10  |
| TMAO (μM)              | 6.57 ± 7.91    | 6.19 ± 6.72    | 6.86 ± 8.74    | 0.71  |
| Acetyl-C, AC2 (μM)     | 7.26 ± 2.82    | 7.09 ± 2.45    | 7.38 ± 3.09    | 0.66  |
| Propionyl-C, AC3 (μM)  | 0.37 ± 0.11    | 0.37 ± 0.12    | 0.37 ± 0.10    | 0.95  |
| Valeryl-C, AC5 (μM)    | 0.17 ± 0.49    | 0.24 ± 0.75    | 0.12 ± 0.05    | 0.28  |
| Octanoyl-C, AC8 (μM)   | 0.14 ± 0.06    | 0.12 ± 0.04    | 0.15 ± 0.06    | 0.043 |
| Lauroyl-C, AC12 (μM)   | 0.06 ± 0.03    | 0.05 ± 0.02    | 0.06 ± 0.03    | 0.034 |
| Myristoyl-C, AC14 (μM) | 0.03 ± 0.01    | 0.02 ± 0.01    | 0.03 ± 0.01    | 0.10  |
| Palmitoyl-C, AC16 (μM) | 0.11 ± 0.03    | 0.10 ± 0.03    | 0.11 ± 0.03    | 0.55  |
| AC2 /AC8               | 57.76 ± 20.12  | 61.91 ± 18.39  | 54.72 ± 20.97  | 0.12  |
| AC2 /AC12              | 138.56 ± 53.12 | 148.54 ± 43.04 | 131.23 ± 58.83 | 0.16  |
| AC2 /AC14              | 283.65 ± 87.17 | 302.08 ± 90.28 | 270.14 ± 83.23 | 0.11  |
| AC2 /AC16              | 69.38 ± 19.93  | 69.80 ± 20.14  | 69.08 ± 20.00  | 0.88  |
| AC3 /AC16              | 3.74 ± 1.35    | 3.81 ± 1.52    | 3.69 ± 1.23    | 0.69  |

---

Data represent mean ± SD, standard deviation of observed values. RA disease activity, measured as disease activity score 28 (DAS28); Remission, RA disease in remission defined as DAS28 ≤ 2.6; Active RA disease defined as DAS28 > 2.6; N, number; SFA, saturated FA; MUFA, monounsaturated FA; PUFA, polyunsaturated FA; n-3 PUFA, sum of n-3 PUFA; n-6 PUFA, sum of n-6 PUFA; Omega-3 index, sum of wt% EPA, eicosapentaenoic acid, and wt% DHA, docosahexaenoic acid; AA, arachidonic acid; ALA, alpha-linolenic acid; LA, linoleic acid; AIFA index, anti-inflammatory fatty acid index; DNL index, de novo lipogenesis index; DGLA, dihomo-gamma-linolenic acid; DPA, docosapentaenoic acid; TG, triglyceride; TC, total cholesterol; HDL-C, high-density lipoprotein cholesterol; LDL-C, low-density lipoprotein

---

cholesterol; PL, phospholipid; NEFA, non-esterified FA; Castelli`s risk index, ratio of TC to HDL-C; Atherogenic index,  $\log_{10}(\text{TG}/\text{HDL-C})$ ; GBB,  $\gamma$ -butyrobetaine; TML, trimethyl lysine; TMAO, trimethylamine N-oxide; Acetyl-C (AC2), Acetyl-Carnitine. Analysed with Student t-test: *P*-level <0.05.

**Supplementary Table S3.** Rheumatoid arthritis patient characteristics grouped by prednisolone medication. Categorical/continuous variables of demographic, behavioral and clinical characteristics, and distribution and concentration of whole blood fatty acids (FA), serum lipids and metabolites.

|                             | Total<br>( <i>N</i> = 78) | No prednisolone<br>( <i>N</i> = 57) | Prednisolone<br>use<br>( <i>N</i> = 21) | <i>P</i> -value |
|-----------------------------|---------------------------|-------------------------------------|-----------------------------------------|-----------------|
| Females (N/%)               | 57/73                     | 18/32                               | 39/68                                   | 0.13            |
| Age (years)                 | 57 ± 12                   | 57 ± 12                             | 57 ± 11                                 | 0.95            |
| BMI (kg/m <sup>2</sup> )    | 26.1 ± 4.3                | 26.4 ± 4.5                          | 25.4 ± 4.1                              | 0.40            |
| <i>Smoking status (N/%)</i> |                           |                                     |                                         |                 |
| Never smokers               | 29/37                     | 18/32                               | 11/52                                   |                 |
| Former smokers              | 35/45                     | 28/49                               | 7/33                                    | 0.24            |
| Current smokers             | 14/19                     | 11/19                               | 7/14                                    |                 |
| <i>Oral data</i>            |                           |                                     |                                         |                 |
| Number of teeth             | 25 ± 5                    | 25 ± 5                              | 24 ± 6                                  | 0.53            |
| PD (mm)                     | 2.8 ± 0.4                 | 2.7 ± 0.4                           | 2.8 ± 0.5                               | 0.41            |
| CAL (mm)                    | 3.1 ± 0.8                 | 3.0 ± 0.7                           | 3.1 ± 1.0                               | 0.50            |
| BoP (% of sites)            | 31 ± 16                   | 32 ± 5                              | 28 ± 16                                 | 0.26            |
| PI (% of sites)             | 33 ± 16                   | 35 ± 17                             | 27 ± 12                                 | 0.05            |
| <i>Periodontitis (N/%)</i>  |                           |                                     |                                         |                 |
| No                          | 14/18                     | 9/16                                | 5/24                                    |                 |
| Mild/ moderate              | 50/64                     | 39/68                               | 11/52                                   | 0.24            |
| Severe                      | 14/18                     | 9/16                                | 5/24                                    |                 |
| <i>RA data</i>              |                           |                                     |                                         |                 |
| Active RA (N/%)             | 45/58                     | 28/49                               | 17/81                                   | 0.012           |
| RA debut (age)              | 43 ± 14                   | 42 ± 14                             | 45 ± 16                                 | 0.51            |
| RA duration (years)         | 15 ± 11                   | 15 ± 12                             | 14 ± 11                                 | 0.65            |



|                        |                 |                 |                 |       |
|------------------------|-----------------|-----------------|-----------------|-------|
| DAS28 (score)          | 3.0 ± 1.1       | 2.7 ± 0.9       | 3.7 ± 1.3       | 0.001 |
| VAS (score)            | 28 ± 21         | 25 ± 18         | 35 ± 25         | 0.07  |
| MHAQ (score)           | 0.37 ± 0.38     | 0.34 ± 0.37     | 0.44 ± 0.40     | 0.30  |
| RF, ACPA (N/%)         | 60/77           | 45/58           | 15/19           | 0.48  |
| <i>Laboratory data</i> |                 |                 |                 |       |
| ESR (mm/hr)            | 19.8 ± 15.5     | 16.7 ± 12.3     | 28.3 ± 20.1     | 0.003 |
| CRP (mg/L)             | 8.8 ± 13.5      | 6.5 ± 10.1      | 15.1 ± 18.9     | 0.012 |
| RF (IU/ml) †           | 184 ± 385       | 202 ± 421       | 132 ± 270       | 0.49  |
| <i>FA data</i>         |                 |                 |                 |       |
| Total FA (mg)          | 3.12 ± 0.54     | 3.05 ± 0.58     | 3.32 ± 0.37     | 0.043 |
| SFA (wt%)              | 37.55 ± 1.95    | 37.53 ± 1.95    | 37.63 ± 1.99    | 0.84  |
| MUFA (wt%)             | 20.59 ± 2.60    | 20.47 ± 2.78    | 20.89 ± 2.06    | 0.54  |
| PUFA (wt%)             | 39.16 ± 2.46    | 39.18 ± 2.42    | 39.10 ± 2.62    | 0.91  |
| Unidentified FA (wt%)  | 2.70 ± 0.64     | 2.82 ± 0.63     | 2.83 ± 0.54     | 0.006 |
| n-3 PUFA (wt%)         | 8.49 ± 2.25     | 8.44 ± 2.34     | 8.62 ± 2.02     | 0.76  |
| n-6 PUFA (wt%)         | 30.67 ± 2.49    | 30.74 ± 2.49    | 30.48 ± 2.54    | 0.69  |
| n-3/n-6                | 0.28 ± 0.09     | 0.28 ± 0.10     | 0.29 ± 0.08     | 0.77  |
| Omega-3 index          | 6.19 ± 2.09     | 6.18 ± 5.60     | 6.24 ± 5.38     | 0.91  |
| AA/EPA                 | 7.82 ± 5.04     | 8.26 ± 5.11     | 6.63 ± 4.73     | 0.21  |
| EPA/ALA                | 3.22 ± 2.29     | 3.29 ± 2.49     | 3.03 ± 1.70     | 0.67  |
| AA/LA                  | 0.50 ± 0.11     | 0.51 ± 0.11     | 0.47 ± 0.10     | 0.25  |
| AIFA index             | 765.63 ± 195.61 | 764.22 ± 202.90 | 769.45 ± 178.95 | 0.92  |
| DNL index              | 1.27 ± 0.21     | 1.27 ± 0.21     | 1.27 ± 1.17     | 0.97  |
| Elongase C18:0/C16:0   | 0.51 ± 0.05     | 0.52 ± 0.05     | 0.48 ± 0.04     | 0.013 |
| Desaturase D5n-6       | 7.52 ± 3.06     | 7.69 ± 3.45     | 7.03 ± 1.59     | 0.40  |
| C14:0 (wt%)            | 0.86 ± 0.37     | 0.79 ± 0.30     | 1.07 ± 0.46     | 0.002 |
| C15:0 (wt%)            | 0.24 ± 0.10     | 0.24 ± 0.22     | 0.25 ± 0.12     | 0.61  |

|                      |              |               |              |       |
|----------------------|--------------|---------------|--------------|-------|
| C16:0 (wt%)          | 23.66 ± 1.61 | 23.56 ± 23.12 | 23.93 ± 1.45 | 0.37  |
| C16:1 (wt%)          | 1.62 ± 0.56  | 1.60 ± 0.58   | 1.69 ± 0.49  | 0.53  |
| C16:3n-3 (wt%)       | 0.34 ± 0.12  | 0.33 ± 0.12   | 0.36 ± 0.11  | 0.38  |
| C17:0 (wt%)          | 0.28 ± 0.13  | 0.28 ± 0.13   | 0.28 ± 0.23  | 0.90  |
| C18:0 (wt%)          | 11.92 ± 0.97 | 12.07 ± 1.0   | 11.51 ± 0.78 | 0.023 |
| C18:1 (wt%)          | 18.05 ± 2.32 | 17.95 ± 2.50  | 18.29 ± 1.77 | 0.57  |
| C18:2n-6, LA (wt%)   | 18.94 ± 2.10 | 18.85 ± 2.15  | 19.17 ± 1.98 | 0.56  |
| C18:3n-3, ALA (wt%)  | 0.61 ± 0.24  | 0.58 ± 0.23   | 0.70 ± 0.24  | 0.06  |
| C18:4n-3 (wt%)       | 0.13 ± 0.08  | 0.12 ± 0.08   | 0.17 ± 0.07  | 0.011 |
| C20:0 (wt%)          | 0.24 ± 0.08  | 0.24 ± 0.08   | 0.24 ± 0.09  | 0.91  |
| C20:1 (wt%)          | 0.18 ± 0.06  | 0.18 ± 0.06   | 0.19 ± 0.06  | 0.76  |
| C20:2n-6 (wt%)       | 0.33 ± 0.12  | 0.32 ± 0.14   | 0.32 ± 0.06  | 0.77  |
| C20:3n-6, DGLA (wt%) | 1.33 ± 0.33  | 1.33 ± 0.34   | 1.32 ± 0.29  | 0.91  |
| C20:4n-6, AA (wt%)   | 9.25 ± 1.43  | 9.36 ± 1.39   | 8.79 ± 1.54  | 0.29  |
| C20:4n-3 (wt%)       | 0.01 ± 0.05  | 0.01 ± 0.05   | 0.01 ± 0.04  | 0.82  |
| C20:5n-3, EPA (wt%)  | 1.74 ± 1.13  | 1.67 ± 1.18   | 1.91 ± 0.99  | 0.42  |
| C22:0 (wt%)          | 0.35 ± 0.07  | 0.36 ± 0.07   | 0.34 ± 0.07  | 0.35  |
| C22:4n-6, AdA (wt%)  | 0.79 ± 0.29  | 0.83 ± 0.28   | 0.68 ± 0.30  | 0.031 |
| C22:5n-6 (wt%)       | 0.03 ± 0.09  | 0.03 ± 0.09   | 0.03 ± 0.07  | 1.0   |
| C22:5n-3, DPA (wt%)  | 1.21 ± 0.22  | 1.22 ± 0.23   | 1.15 ± 0.14  | 0.18  |
| C22:6n-3, DHA (wt%)  | 4.46 ± 1.08  | 4.51 ± 1.11   | 4.33 ± 0.99  | 0.53  |
| C24:1n-9 (wt%)       | 0.73 ± 0.16  | 0.74 ± 0.16   | 0.72 ± 0.64  | 0.62  |

### *Lipids*

|                |             |             |             |      |
|----------------|-------------|-------------|-------------|------|
| TG (mmol/L)    | 1.20 ± 0.82 | 1.17 ± 0.90 | 1.29 ± 0.55 | 0.58 |
| TC (mmol/L)    | 5.52 ± 1.22 | 5.35 ± 1.19 | 5.95 ± 2.21 | 0.05 |
| HDL-C (mmol/L) | 1.64 ± 0.50 | 1.58 ± 0.45 | 1.81 ± 0.57 | 0.06 |
| LDL-C (mmol/L) | 3.29 ± 0.93 | 3.21 ± 0.90 | 3.52 ± 1.00 | 0.19 |

|                        |                |                |                |       |
|------------------------|----------------|----------------|----------------|-------|
| PL (mmol/L)            | 3.04 ± 0.55    | 2.95 ± 0.54    | 3.29 ± 0.51    | 0.015 |
| NEFA (mmol/L)          | 0.51 ± 0.27    | 0.51 ± 0.21    | 0.50 ± 0.40    | 0.89  |
| HDL-C/LDL-C ratio      | 0.54 ± 0.24    | 0.54 ± 0.23    | 0.55 ± 0.25    | 0.80  |
| Non HDL-C (mmol/L)     | 3.87 ± 1.15    | 3.77 ± 1.17    | 4.14 ± 1.08    | 0.22  |
| Castelli's risk index  | 3.63 ± 1.36    | 3.68 ± 1.48    | 3.51 ± 0.97    | 0.62  |
| Atherogenic index      | -0.17 ± 0.30   | -0.18 ± 0.32   | -0.16 ± 0.27   | 0.81  |
| <i>Metabolites</i>     |                |                |                |       |
| Betaine (μM)           | 40.32 ± 19.30  | 42.21 ± 21.41  | 35.18 ± 10.65  | 0.16  |
| Choline (μM)           | 10.73 ± 2.46   | 11.12 ± 2.43   | 9.69 ± 2.29    | 0.022 |
| L-carnitine (μM)       | 36.66 ± 8.07   | 37.82 ± 8.05   | 33.53 ± 7.42   | 0.036 |
| GBB (μM)               | 0.91 ± 0.22    | 0.95 ± 0.22    | 0.79 ± 0.17    | 0.003 |
| TML (μM)               | 0.49 ± 0.18    | 0.50 ± 0.19    | 0.47 ± 0.13    | 0.47  |
| TMAO (μM)              | 6.57 ± 7.91    | 6.18 ± 7.60    | 7.63 ± 8.80    | 0.48  |
| Acetyl-C, AC2 (μM)     | 7.26 ± 2.82    | 7.75 ± 2.83    | 5.92 ± 2.36    | 0.010 |
| Propionyl-C, AC3 (μM)  | 0.37 ± 0.11    | 0.38 ± 0.12    | 0.35 ± 0.09    | 0.38  |
| Valeryl-C, AC5 (μM)    | 0.17 ± 0.49    | 0.19 ± 0.57    | 0.13 ± 0.06    | 0.64  |
| Octanoyl-C, AC8 (μM)   | 0.14 ± 0.06    | 0.14 ± 0.05    | 0.13 ± 0.06    | 0.43  |
| Lauroyl-C, AC12 (μM)   | 0.06 ± 0.03    | 0.06 ± 0.03    | 0.06 ± 0.03    | 0.56  |
| Myristoyl-C, AC14 (μM) | 0.03 ± 0.01    | 0.03 ± 0.01    | 0.03 ± 0.01    | 0.39  |
| Palmitoyl-C, AC16 (μM) | 0.11 ± 0.03    | 0.11 ± 0.03    | 0.09 ± 0.02    | 0.05  |
| AC2 /AC8               | 57.76 ± 20.12  | 60.16 ± 20.50  | 51.25 ± 17.89  | 0.08  |
| AC2 /AC12              | 138.56 ± 53.12 | 146.18 ± 54.87 | 117.92 ± 42.68 | 0.036 |
| AC2 /AC14              | 283.65 ± 87.17 | 299.47 ± 89.47 | 240.71 ± 64.73 | 0.007 |
| AC2 /AC16              | 69.38 ± 19.93  | 71.99 ± 20.07  | 62.30 ± 18.13  | 0.06  |
| AC3 /AC16              | 3.74 ± 1.35    | 3.66 ± 1.36    | 3.08 ± 1.33    | 0.39  |

Data represent mean ± SD, standard deviation of observed values. N/%, number/percentage; Age, patient's age in years at the time of clinical examination; BMI, body mass index; PD, probing depth; CAL, clinical attachment level; BoP, bleeding on probing; PI, plaque index; RA disease

---

activity, measured as disease activity score 28 (DAS28); Remission, RA disease in remission defined as  $DAS28 \leq 2.6$ ; Active RA disease defined as  $DAS28 > 2.6$ ; VAS, patient global health assessment score on a visual analogue scale; MHAQ, modified health assessment questionnaire; RF, ACPA, seropositivity, positive tests for rheumatoid factor (RF) (N=74) and/or anti-citrullinated protein antibody (ACPA) (N=77); ESR, erythrocyte sedimentation rate; CRP, C-reactive protein. SFA, saturated FA; MUFA, monounsaturated FA; PUFA, polyunsaturated FA; n-3 PUFA, sum of n-3 PUFA; n-6 PUFA, sum of n-6 PUFA; Omega-3 index, sum of wt% EPA, eicosapentaenoic acid, and wt% DHA, docosahexaenoic acid; AA, arachidonic acid; ALA, alpha-linolenic acid; LA, linoleic acid; AIFA index, anti-inflammatory fatty acid index; DNL index, de novo lipogenesis index; DGLA, dihomo-gamma-linolenic acid; AdA, adrenic acid; DPA, docosapentaenoic acid; TG, triglyceride; TC, total cholesterol; HDL-C, high-density lipoprotein cholesterol; LDL-C, low-density lipoprotein cholesterol; PL, phospholipid; NEFA, non-esterified FA; Castelli's risk index, ratio of TC to HDL-C; Atherogenic index,  $\log_{10}(TG/HDL-C)$ ; GBB,  $\gamma$ -butyrobetaine; TML, trimethyl lysine; TMAO, trimethylamine N-oxide; Acetyl-C (AC2), Acetyl-Carnitine. Analysed with Pearson chi-square and Student t-test: P-level <0.05. † n = 74

**Supplementary Table S4.** Distribution of demographic, behavioral and clinical continuous variables including lipid-, metabolite- and fatty acid (FA) concentrations in rheumatoid arthritis (RA) patients ( $N = 78$ ) grouped by periodontal diagnosis.

| Variables                | Periodontitis      |                                |                        | <i>P</i> -value |
|--------------------------|--------------------|--------------------------------|------------------------|-----------------|
|                          | No<br>( $N = 14$ ) | Mild/ moderate<br>( $N = 50$ ) | Severe<br>( $N = 14$ ) |                 |
| Age (years)              | 54 ± 11            | 56 ± 12                        | 63 ± 9                 | 0.07            |
| BMI (kg/m <sup>2</sup> ) | 27 ± 4             | 25 ± 4                         | 28 ± 5                 | 0.10            |
| <i>Oral data</i>         |                    |                                |                        |                 |
| Number of teeth          | 27 ± 2             | 25 ± 5                         | 22 ± 6                 | 0.016           |
| PD (mm)                  | 2.4 ± 0.1          | 2.7 ± 0.2                      | 3.3 ± 0.5              | <0.001          |
| CAL (mm)                 | 2.6 ± 0.2          | 2.9 ± 0.4                      | 4.1 ± 1.2              | <0.001          |
| BoP (%)                  | 22 ± 11            | 29 ± 13                        | 47 ± 17                | <0.001          |
| PI (%)                   | 24 ± 9             | 33 ± 15                        | 42 ± 22                | 0.016           |
| <i>RA data</i>           |                    |                                |                        |                 |
| RA debut (age)           | 40 ± 13            | 41 ± 15                        | 53 ± 10                | 0.020           |
| RA duration (years)      | 15 ± 10            | 16 ± 12                        | 11 ± 10                | 0.42            |
| DAS28 (score)            | 2.8 ± 0.9          | 3.0 ± 1.2                      | 3.2 ± 1.1              | 0.75            |
| VAS (score)              | 29 ± 21            | 25 ± 19                        | 39 ± 25                | 0.06            |
| MHAQ (score)             | 0.31 ± 0.42        | 0.35 ± 0.36                    | 0.49 ± 0.40            | 0.40            |
| <i>Laboratory data</i>   |                    |                                |                        |                 |
| RF (IU/ml) †             | 162 ± 496          | 217 ± 402                      | 96 ± 119               | 0.58            |
| CRP (mg/L)               | 5 ± 5              | 9 ± 15                         | 13 ± 15                | 0.35            |
| ESR (mm/hr)              | 17 ± 13            | 21 ± 17                        | 18 ± 12                | 0.64            |
| <i>FA</i>                |                    |                                |                        |                 |
| Total FA (mg)            | 3.47 ± 0.75        | 3.02 ± 0.45                    | 3.13 ± 0.46            | 0.021           |
| SFA (wt%)                | 37.39 ± 1.60       | 37.71 ± 2.02                   | 37.18 ± 2.06           | 0.63            |
| MUFA (wt%)               | 21.18 ± 3.38       | 20.17 ± 2.26                   | 21.49 ± 2.75           | 0.16            |
| PUFA (wt%)               | 39.09 ± 3.12       | 39.35 ± 2.45                   | 38.54 ± 1.72           | 0.55            |
| Unidentified FA (wt%)    | 2.34 ± 0.65        | 2.78 ± 0.63                    | 2.79 ± 0.58            | 0.06            |
| n-3 PUFA (wt%)           | 8.97 ± 2.95        | 8.62 ± 2.17                    | 7.58 ± 1.48            | 0.22            |
| n-6 PUFA (wt%)           | 30.13 ± 2.66       | 30.74 ± 2.48                   | 30.96 ± 2.46           | 0.65            |
| n-3/n-6                  | 0.30 ± 0.12        | 0.29 ± 0.09                    | 0.25 ± 0.07            | 0.27            |
| Omega-3 index            | 6.50 ± 2.85        | 6.35 ± 2.00                    | 5.33 ± 1.30            | 0.23            |
| AA/EPA                   | 7.08 ± 5.01        | 7.70 ± 5.26                    | 8.97 ± 4.32            | 0.60            |
| EPA/ALA                  | 3.38 ± 3.51        | 3.38 ± 1.96                    | 2.48 ± 1.91            | 0.42            |
| AA/LA                    | 0.46 ± 0.11        | 0.51 ± 0.11                    | 0.48 ± 0.10            | 0.31            |
| AIFA index               | 787.11 ± 269.33    | 779.85 ± 186.64                | 693.38 ± 126.14        | 0.31            |
| DNL index                | 1.26 ± 0.20        | 1.28 ± 0.23                    | 1.24 ± 0.18            | 0.77            |
| Elongase C18:0/C16:0     | 0.49 ± 0.06        | 0.51 ± 0.05                    | 0.50 ± 0.05            | 0.21            |
| Desaturase D5n-6         | 7.59 ± 2.66        | 7.80 ± 3.43                    | 6.41 ± 1.57            | 0.33            |
| C14:0 (wt%)              | 1.01 ± 0.35        | 0.83 ± 0.37                    | 0.85 ± 0.36            | 0.28            |
| C15:0 (wt%)              | 0.25 ± 0.12        | 0.25 ± 0.09                    | 0.23 ± 0.10            | 0.88            |

|                        |              |               |               |       |
|------------------------|--------------|---------------|---------------|-------|
| C16:0 (wt%)            | 23.80 ± 1.33 | 23.67 ± 1.74  | 23.46 ± 1.46  | 0.86  |
| C16:1 (wt%)            | 1.73 ± 0.72  | 1.57 ± 0.55   | 1.73 ± 0.39   | 0.47  |
| C16:3n-3 (wt%)         | 0.37 ± 0.13  | 0.33 ± 0.12   | 0.33 ± 0.10   | 0.92  |
| C17:0 (wt%)            | 0.27 ± 0.11  | 0.28 ± 0.13   | 0.28 ± 0.12   | 0.92  |
| C18:0 (wt%)            | 11.51 ± 1.18 | 12.08 ± 0.87  | 11.77 ± 1.01  | 0.13  |
| C18:1 (wt%)            | 18.53 ± 2.91 | 17.68 ± 2.05  | 18.85 ± 2.47  | 0.17  |
| C18:2n-6, LA (wt%)     | 19.15 ± 2.23 | 18.81 ± 2.18  | 19.20 ± 1.71  | 0.77  |
| C18:3n-3, ALA (wt%)    | 0.74 ± 0.27  | 0.56 ± 0.20   | 0.67 ± 0.31   | 0.026 |
| C18:4n-3 (wt%)         | 0.17 ± 0.07  | 0.13 ± 0.08   | 0.12 ± 0.09   | 0.18  |
| C20:0 (wt%)            | 0.24 ± 0.06  | 0.24 ± 0.09   | 0.24 ± 0.08   | 0.99  |
| C20:1 (wt%)            | 0.19 ± 0.07  | 0.18 ± 0.06   | 0.18 ± 0.05   | 0.91  |
| C20:2n-6 (wt%)         | 0.30 ± 0.08  | 0.35 ± 0.13   | 0.30 ± 0.12   | 0.48  |
| C20:3n-6, DGLA (wt%)   | 1.24 ± 0.32  | 1.32 ± 0.33   | 1.48 ± 0.29   | 0.14  |
| C20:4n-6, AA (wt%)     | 8.74 ± 1.56  | 9.42 ± 1.32   | 9.16 ± 1.68   | 0.28  |
| C20:4n-3 (wt%)         | 0.03 ± 0.08  | 0.01 ± 0.04   | 0 ± 0         | 0.16  |
| C20:5n-3, EPA (wt%)    | 2.08 ± 1.68  | 1.78 ± 1.03   | 1.24 ± 0.62   | 0.14  |
| C22:0 (wt%)            | 0.33 ± 0.07  | 0.36 ± 0.08   | 0.35 ±        | 0.28  |
| C22:4n-6, Ada (wt%)    | 0.70 ± 0.31  | 0.82 ± 0.27   | 0.79 ± 0.33   | 0.40  |
| C22:5n-6 (wt%)         | 0 ± 0        | 0.03 ± 0.10   | 0.03 ± 0.07   | 0.44  |
| C22:5n-3, DPA (wt%)    | 0.16 ± 0.28  | 1.24 ± 0.21   | 1.13 ± 0.15   | 0.15  |
| C22:6n-3, DHA (wt%)    | 4.42 ± 1.28  | 4.57 ± 1.07   | 4.09 ± 0.85   | 0.33  |
| C24:1n-9 (wt%)         | 0.73 ± 0.20  | 0.73 ± 0.17   | 0.73 ± 0.13   | 1     |
| <i>Lipids</i>          |              |               |               |       |
| TG (mmol/L)            | 1.68 ± 1.40  | 1.01 ± 0.44   | 1.42 ± 0.92   | 0.013 |
| TC (mmol/L)            | 5.78 ± 1.67  | 5.38 ± 1.05   | 5.69 ± 1.30   | 0.47  |
| HDL-C (mmol/L)         | 1.73 ± 0.43  | 1.69 ± 0.53   | 1.38 ± 0.36   | 0.09  |
| LDL-C (mmol/L)         | 3.27 ± 1.06  | 2.21 ± 0.85   | 3.58 ± 1.09   | 0.44  |
| PL (mmol/L)            | 3.32 ± 0.74  | 2.96 ± 0.47   | 3.06 ± 0.57   | 0.10  |
| NEFA (mmol/L)          | 0.55 ± 0.24  | 0.50 ± 0.30   | 0.48 ± 0.18   | 0.79  |
| HDL-C/LDL-C            | 0.58 ± 0.21  | 0.57 ± 0.26   | 0.42 ± 0.14   | 0.09  |
| Non HDL-C (mmol/L)     | 4.05 ± 1.59  | 3.70 ± 0.98   | 4.31 ± 1.18   | 0.17  |
| Castelli's risk index  | 3.47 ± 1.12  | 3.5 ± 1.44    | 4.27 ± 1.14   | 0.15  |
| Atherogenic index      | -0.09 ± 0.32 | -0.24 ± 0.29  | -0.04 ± 0.30  | 0.049 |
| <i>Metabolites</i>     |              |               |               |       |
| Betaine (μM)           | 33.52 ± 7.34 | 38.97 ± 12.79 | 51.94 ± 36.54 | 0.027 |
| Choline (μM)           | 9.74 ± 1.39  | 10.60 ± 2.28  | 12.20 ± 3.31  | 0.023 |
| L-carnitine (μM)       | 36.60 ± 6.75 | 35.43 ± 8.54  | 41.13 ± 6.14  | 0.06  |
| GBB (μM)               | 0.85 ± 0.18  | 0.91 ± 0.22   | 0.96 ± 0.24   | 0.44  |
| TML (μM)               | 0.45 ± 0.13  | 0.48 ± 0.16   | 0.59 ± 0.24   | 0.06  |
| TMAO (μM)              | 4.57 ± 3.01  | 7.46 ± 9.58   | 5.42 ± 2.51   | 0.41  |
| Acetyl-C, AC2 (μM)     | 7.24 ± 2.67  | 7.31 ± 3.08   | 7.07 ± 2.02   | 0.96  |
| Propionyl-C, AC3 (μM)  | 0.39 ± 0.14  | 0.35 ± 0.09   | 0.44 ± 0.12   | 0.015 |
| Valeryl-C, AC5 (μM)    | 0.13 ± 0.08  | 0.19 ± 0.61   | 0.13 ± 0.04   | 0.88  |
| Octanoyl-C, AC8 (μM)   | 0.14 ± 0.06  | 0.13 ± 0.06   | 0.15 ± 0.06   | 0.57  |
| Lauroyl-C, AC12 (μM)   | 0.06 ± 0.03  | 0.06 ± 0.03   | 0.07 ± 0.04   | 0.46  |
| Myristoyl-C, AC14 (μM) | 0.03 ± 0.01  | 0.03 ± 0.01   | 0.03 ± 0.02   | 0.25  |

|                              |                    |                    |                    |      |
|------------------------------|--------------------|--------------------|--------------------|------|
| Palmitoyl-C, AC16 ( $\mu$ M) | 0.11 $\pm$ 0.04    | 0.10 $\pm$ 0.03    | 0.11 $\pm$ 0.03    | 0.41 |
| AC2 /AC8                     | 56.49 $\pm$ 21.47  | 60.25 $\pm$ 21.20  | 50.14 $\pm$ 12.40  | 0.25 |
| AC2 /AC12                    | 136.61 $\pm$ 53.85 | 144.67 $\pm$ 57.18 | 118.66 $\pm$ 30.28 | 0.27 |
| AC2 /AC14                    | 273.91 $\pm$ 65.73 | 296.02 $\pm$ 95.09 | 249.24 $\pm$ 68.11 | 0.19 |
| AC2 /AC16                    | 69.08 $\pm$ 19.20  | 71.04 $\pm$ 21.01  | 63.79 $\pm$ 16.58  | 0.49 |
| AC3 /AC16                    | 3.80 $\pm$ 1.31    | 3.63 $\pm$ 1.35    | 4.08 $\pm$ 1.43    | 0.54 |

Data represent mean  $\pm$  SD, standard deviation of observed values. Age, age in years at the time of clinical examination; BMI, body mass index; PD, probing depth; CAL, clinical attachment level; BoP, percentage of sites with bleeding on probing; PI, percentage of sites with dental plaque; RA debut, age when diagnosed with RA; DAS28, RA disease activity score; VAS, patient global health assessment score on a visual analogue scale; MHAQ, modified health assessment questionnaire; RF, rheumatoid factor; CRP, C-reactive protein; ESR, erythrocyte sedimentation rate; SFA, saturated FA; MUFA, monounsaturated FA; PUFA, polyunsaturated FA; n-3 PUFA, sum of n-3 PUFA; n-6 PUFA, sum of n-6 PUFA; Omega-3 index, sum of wt% EPA, eicosapentaenoic acid, and wt% DHA, docosahexaenoic acid; AA, arachidonic acid; ALA, alpha-linolenic acid; LA, linoleic acid; AIFA index, anti-inflammatory fatty acid index; DNL index, de novo lipogenesis index; DGLA, dihomo-gamma-linolenic acid; AdA, adrenic acid; DPA, docosapentaenoic acid; TG, triglyceride; TC, total cholesterol; HDL-C, high-density lipoprotein cholesterol; LDL-C, low-density lipoprotein cholesterol; PL, phospholipid; NEFA, non-esterified FA; Castelli's risk index, ratio TC/HDL-C; Atherogenic index,  $\log_{10}(\text{TG}/\text{HDL-C})$ ; GBB,  $\gamma$ -butyrobetaine; TML, trimethyl lysine; TMAO, trimethylamine N-oxide; Acetyl-C (AC2), Acetyl-Carnitine. Analysed with one-way ANOVA: *P*-level <0.05. † n = 74

**Supplementary Table S5.** Distribution of demographic, behavioral and clinical continuous variables including lipid-, metabolite- and fatty acid (FA) concentrations in rheumatoid arthritis (RA) patients ( $N = 78$ ) grouped by clinical attachment level (CAL)  $\leq 5\text{mm}$  CAL  $> 5\text{mm}$ .

| Variables                | CAL $\leq 5\text{mm}$<br>( $N = 50$ ) | CAL $> 5\text{mm}$<br>( $N = 28$ ) | <i>P</i> -value |
|--------------------------|---------------------------------------|------------------------------------|-----------------|
| Age (years)              | 53 $\pm$ 11                           | 64 $\pm$ 9                         | <0.001          |
| BMI (kg/m <sup>2</sup> ) | 26 $\pm$ 5                            | 27 $\pm$ 4                         | 0.20            |
| <i>Oral data</i>         |                                       |                                    |                 |
| Number of teeth          | 26 $\pm$ 4                            | 23 $\pm$ 6                         | 0.005           |
| PD (mm)                  | 2.6 $\pm$ 0.2                         | 3.0 $\pm$ 0.5                      | <0.001          |
| CAL (mm)                 | 2.7 $\pm$ 0.2                         | 3.7 $\pm$ 1.0                      | <0.001          |
| BoP (%)                  | 27 $\pm$ 13                           | 39 $\pm$ 17                        | 0.001           |
| PI (%)                   | 28 $\pm$ 11                           | 42 $\pm$ 20                        | <0.001          |
| <i>RA data</i>           |                                       |                                    |                 |
| RA debut (age)           | 38 $\pm$ 13                           | 52 $\pm$ 12                        | <0.001          |
| RA duration (years)      | 16 $\pm$ 12                           | 12 $\pm$ 11                        | 0.17            |
| DAS28 (score)            | 2.9 $\pm$ 1.1                         | 3.1 $\pm$ 1.1                      | 0.49            |
| VAS (score)              | 27 $\pm$ 19                           | 30 $\pm$ 23                        | 0.59            |
| MHAQ (score)             | 0.35 $\pm$ 0.39                       | 0.41 $\pm$ 0.37                    | 0.48            |
| <i>Laboratory data</i>   |                                       |                                    |                 |
| RF (IU/ml) †             | 191 $\pm$ 437                         | 170 $\pm$ 271                      | 0.83            |
| CRP (mg/L)               | 8 $\pm$ 14                            | 10 $\pm$ 12                        | 0.55            |
| ESR (mm/hr)              | 18 $\pm$ 16                           | 23 $\pm$ 15                        | 0.17            |
| <i>FA data</i>           |                                       |                                    |                 |
| Total FA (mg)            | 3.12 $\pm$ 0.60                       | 3.12 $\pm$ 0.42                    | 0.96            |
| SFA (wt%)                | 37.49 $\pm$ 1.74                      | 37.67 $\pm$ 2.30                   | 0.70            |
| MUFA (wt%)               | 20.53 $\pm$ 2.70                      | 20.68 $\pm$ 2.46                   | 0.81            |
| PUFA (wt%)               | 39.32 $\pm$ 2.65                      | 38.88 $\pm$ 2.10                   | 0.45            |
| Unidentified FA (wt%)    | 2.67 $\pm$ 0.67                       | 2.77 $\pm$ 0.57                    | 0.49            |
| n-3 PUFA (wt%)           | 8.53 $\pm$ 2.41                       | 8.43 $\pm$ 1.95                    | 0.86            |
| n-6 PUFA (wt%)           | 30.79 $\pm$ 2.54                      | 30.44 $\pm$ 2.43                   | 0.56            |
| n-3/n-6                  | 0.28 $\pm$ 0.10                       | 0.28 $\pm$ 0.08                    | 0.99            |
| Omega-3 index            | 6.18 $\pm$ 2.27                       | 6.22 $\pm$ 1.77                    | 0.93            |
| AA/EPA                   | 8.18 $\pm$ 5.40                       | 7.18 $\pm$ 4.33                    | 0.41            |
| EPA/ALA                  | 3.01 $\pm$ 2.31                       | 3.59 $\pm$ 2.72                    | 0.28            |
| AA/LA                    | 0.50 $\pm$ 0.11                       | 0.50 $\pm$ 0.10                    | 0.84            |
| AIFA index               | 761.17 $\pm$ 211.62                   | 773.60 $\pm$ 166.58                | 0.79            |
| DNL index                | 1.26 $\pm$ 0.20                       | 1.29 $\pm$ 0.24                    | 0.56            |
| Elongase C18:0/C16:0     | 0.51 $\pm$ 0.05                       | 0.50 $\pm$ 0.05                    | 0.58            |
| Desaturase D5n-6         | 7.88 $\pm$ 3.62                       | 6.82 $\pm$ 1.50                    | 0.16            |
| C14:0 (wt%)              | 0.88 $\pm$ 0.39                       | 0.84 $\pm$ 0.33                    | 0.68            |
| C15:0 (wt%)              | 0.24 $\pm$ 0.10                       | 0.25 $\pm$ 0.08                    | 0.80            |
| C16:0 (wt%)              | 23.55 $\pm$ 1.53                      | 23.85 $\pm$ 1.76                   | 0.44            |
| C16:1 (wt%)              | 1.60 $\pm$ 0.59                       | 1.67 $\pm$ 0.50                    | 0.56            |



|                        |               |               |       |
|------------------------|---------------|---------------|-------|
| C16:3n-3 (wt%)         | 0.35 ± 0.12   | 0.32 ± 0.11   | 0.32  |
| C17:0 (wt%)            | 0.30 ± 0.14   | 0.25 ± 0.10   | 0.11  |
| C18:0 (wt%)            | 11.92 ± 0.89  | 11.92 ± 1.12  | 0.98  |
| C18:1 (wt%)            | 18.03 ± 2.39  | 18.08 ± 2.23  | 0.93  |
| C18:2n-6, LA (wt%)     | 18.99 ± 2.10  | 18.85 ± 2.13  | 0.78  |
| C18:3n-3, ALA (wt%)    | 0.63 ± 0.22   | 0.59 ± 0.28   | 0.54  |
| C18:4n-3 (wt%)         | 0.13 ± 0.08   | 0.13 ± 0.08   | 0.82  |
| C20:0 (wt%)            | 0.25 ± 0.09   | 0.22 ± 0.06   | 0.09  |
| C20:1 (wt%)            | 0.18 ± 0.06   | 0.18 ± 0.06   | 1     |
| C20:2n-6 (wt%)         | 0.34 ± 0.13   | 0.30 ± 0.10   | 0.14  |
| C20:3n-6, DGLA (wt%)   | 1.30 ± 0.34   | 1.38 ± 0.30   | 0.29  |
| C20:4n-6, AA (wt%)     | 9.32 ± 1.49   | 9.14 ± 1.35   | 0.59  |
| C20:4n-3 (wt%)         | 0.02 ± 0.06   | 0.01 ± 0.02   | 0.25  |
| C20:5n-3, EPA (wt%)    | 1.75 ± 1.25   | 1.71 ± 0.91   | 0.86  |
| C22:0 (wt%)            | 0.36 ± 0.07   | 0.35 ± 0.08   | 0.50  |
| C22:4n-6, AdA (wt%)    | 0.83 ± 0.30   | 0.73 ± 0.28   | 0.17  |
| C22:5n-6 (wt%)         | 0.02 ± 0.07   | 0.05 ± 0.11   | 0.14  |
| C22:5n-3, DPA (wt%)    | 1.23 ± 0.23   | 1.17 ± 0.20   | 0.26  |
| C22:6n-3, DHA (wt%)    | 4.43 ± 1.14   | 4.52 ± 0.99   | 0.72  |
| C24:1n-9 (wt%)         | 0.72 ± 0.17   | 0.75 ± 0.15   | 0.48  |
| <i>Lipids</i>          |               |               |       |
| TG (mmol/L)            | 1.20 ± 0.87   | 1.20 ± 0.72   | 0.99  |
| TC (mmol/L)            | 5.51 ± 1.24   | 5.51 ± 1.20   | 0.98  |
| HDL-C (mmol/L)         | 1.72 ± 0.49   | 1.49 ± 0.48   | 0.048 |
| LDL-C (mmol/L)         | 3.23 ± 0.88   | 3.39 ± 1.03   | 0.49  |
| PL (mmol/L)            | 3.07 ± 0.58   | 3.00 ± 0.51   | 0.58  |
| NEFA (mmol/L)          | 0.52 ± 0.29   | 0.49 ± 0.22   | 0.67  |
| HDL-C/LDL-C ratio      | 0.57 ± 0.23   | 0.49 ± 0.24   | 0.12  |
| Non HDL-C (mmol/L)     | 3.79 ± 1.14   | 4.01 ± 1.18   | 0.41  |
| Castelli`s risk index  | 3.37 ± 0.96   | 4.10 ± 1.80   | 0.023 |
| Atherogenic index      | -0.21 ± 0.29  | -0.13 ± 0.33  | 0.28  |
| <i>Metabolites</i>     |               |               |       |
| Betaine (μM)           | 36.32 ± 11.85 | 47.47 ± 26.93 | 0.013 |
| Choline (μM)           | 11.20 ± 2.23  | 11.70 ± 2.61  | 0.009 |
| L-carnitine (μM)       | 35.04 ± 7.76  | 39.55 ± 7.92  | 0.017 |
| GBB (μM)               | 0.87 ± 0.21   | 0.96 ± 0.22   | 0.08  |
| TML (μM)               | 0.45 ± 0.13   | 0.57 ± 0.22   | 0.003 |
| TMAO (μM)              | 6.16 ± 8.11   | 7.31 ± 7.62   | 0.54  |
| Acetyl-C, AC2 (μM)     | 7.28 ± 3.3    | 7.22 ± 1.82   | 0.93  |
| Propionyl-C, AC3 (μM)  | 0.36 ± 0.11   | 0.39 ± 0.11   | 0.26  |
| Valeryl-C, AC5 (μM)    | 0.20 ± 0.61   | 0.12 ± 0.04   | 0.52  |
| Octanoyl-C, AC8 (μM)   | 0.13 ± 0.06   | 0.14 ± 0.06   | 0.38  |
| Lauroyl-C, AC12 (μM)   | 0.06 ± 0.03   | 0.06 ± 0.03   | 0.47  |
| Myristoyl-C, AC14 (μM) | 0.03 ± 0.01   | 0.03 ± 0.01   | 0.09  |
| Palmitoyl-C, AC16 (μM) | 0.10 ± 0.03   | 0.11 ± 0.03   | 0.07  |
| AC2 /AC8               | 59.08 ± 21.42 | 55.40 ± 17.68 | 0.44  |

|           |                |                |      |
|-----------|----------------|----------------|------|
| AC2 /AC12 | 140.14 ± 50.86 | 135.73 ± 57.80 | 0.73 |
| AC2 /AC14 | 293.55 ± 87.37 | 265.99 ± 85.49 | 0.18 |
| AC2 /AC16 | 71.70 ± 22.15  | 65.24 ± 14.62  | 0.17 |
| AC3 /AC16 | 3.83 ± 1.42    | 3.60 ± 3.12    | 0.48 |

Data represent mean ± SD, standard deviation of observed values. CAL > 5mm, patients with at least 2 sites with CAL > 5mm; Age, age in years at the time of clinical examination; BMI, body mass index; PD, probing depth; CAL, clinical attachment level; BoP, percentage of sites with bleeding on probing; PI, percentage of sites with dental plaque; RA debut, age when diagnosed with RA; DAS28, RA disease activity score; VAS, patient global health assessment score on a visual analogue scale; MHAQ, modified health assessment questionnaire; RF, rheumatoid factor; CRP, C-reactive protein; ESR, erythrocyte sedimentation rate; SFA, saturated FA; MUFA, monounsaturated FA; PUFA, polyunsaturated FA; n-3 PUFA, sum of n-3 PUFA; n-6 PUFA, sum of n-6 PUFA; Omega-3 index, sum of wt% EPA, eicosapentaenoic acid, and wt% DHA, docosahexaenoic acid; AA, arachidonic acid; ALA, alpha-linolenic acid; LA, linoleic acid; AIFA index, anti-inflammatory fatty acid index; DNL index, de novo lipogenesis index; DGLA, dihomo-gamma-linolenic acid; AdA, adrenic acid; DPA, docosapentaenoic acid; TG, triglyceride; TC, total cholesterol; HDL-C, high-density lipoprotein cholesterol; LDL-C, low-density lipoprotein cholesterol; PL, phospholipid; NEFA, non-esterified FA; Castelli's risk index, ratio TC/HDL-C; Atherogenic index, log<sub>10</sub>(TG/HDL-C); GBB,  $\gamma$ -butyrobetaine; TML, trimethyl lysine; TMAO, trimethylamine N-oxide; Acetyl-C (AC2), Acetyl-Carnitine. Analysed with Student t-test: *P*-level <0.05. † n = 74

**Supplementary Table S6.** Distribution of demographic, behavioral and clinical continuous variables including lipid-, metabolite- and fatty acid (FA) concentrations in rheumatoid arthritis (RA) patients ( $N = 78$ ) grouped by smoking status.

| Variables                | Smoking status        |                        |                         | <i>P</i> -value |
|--------------------------|-----------------------|------------------------|-------------------------|-----------------|
|                          | Never<br>( $N = 29$ ) | Former<br>( $N = 35$ ) | Current<br>( $N = 14$ ) |                 |
| Age (years)              | 57 ± 12               | 58 ± 11                | 54 ± 12                 | 0.49            |
| BMI (kg/m <sup>2</sup> ) | 24 ± 3                | 28 ± 5                 | 26 ± 3                  | 0.002           |
| <i>Oral data</i>         |                       |                        |                         |                 |
| Number of teeth          | 26 ± 2                | 23 ± 6                 | 25 ± 5                  | 0.033           |
| PD (mm)                  | 2.6 ± 0.2             | 2.8 ± 0.4              | 3.1 ± 0.5               | 0.002           |
| CAL (mm)                 | 2.8 ± 0.3             | 3.1 ± 0.8              | 3.5 ± 1.1               | 0.011           |
| BoP (%)                  | 25 ± 10               | 31 ± 15                | 44 ± 18                 | <0.001          |
| PI (%)                   | 30 ± 14               | 33 ± 19                | 37 ± 14                 | 0.41            |
| <i>RA data</i>           |                       |                        |                         |                 |
| RA debut (age)           | 45 ± 17               | 42 ± 12                | 41 ± 13                 | 0.62            |
| RA duration (years)      | 13 ± 11               | 17 ± 12                | 13 ± 10                 | 0.34            |
| DAS28 (score)            | 2.8 ± 0.9             | 3.1 ± 1.3              | 3.1 ± 0.9               | 0.63            |
| VAS (score)              | 25 ± 21               | 29 ± 20                | 31 ± 24                 | 0.53            |
| MHAQ (score)             | 0.28 ± 0.38           | 0.41 ± 0.38            | 0.46 ± 0.34             | 0.27            |
| <i>Laboratory data</i>   |                       |                        |                         |                 |
| RF (IU/ml) †             | 123 ± 253             | 240 ± 514              | 168 ± 199               | 0.50            |
| CRP (mg/L)               | 7 ± 8                 | 11 ± 17                | 7 ± 11                  | 0.39            |
| ESR (mm/hr)              | 21 ± 14               | 20 ± 18                | 18 ± 13                 | 0.83            |
| <i>FA data</i>           |                       |                        |                         |                 |
| Total FA (mg)            | 3.16 ± 0.41           | 3.16 ± 0.66            | 2.94 ± 0.43             | 0.38            |
| SFA (wt%)                | 37.94 ± 2.27          | 37.39 ± 1.63           | 37.15 ± 1.96            | 0.37            |
| MUFA (wt%)               | 19.83 ± 1.96          | 21.00 ± 2.93           | 21.12 ± 2.71            | 0.14            |
| PUFA (wt%)               | 39.46 ± 2.70          | 38.97 ± 2.25           | 39.00 ± 2.57            | 0.70            |
| Unidentified FA (wt%)    | 0.76 ± 0.62           | 2.64 ± 0.65            | 2.74 ± 0.67             | 0.73            |
| n-3 PUFA (wt%)           | 9.46 ± 2.21           | 7.99 ± 1.99            | 7.75 ± 2.36             | 0.011           |
| n-6 PUFA (wt%)           | 30.00 ± 2.35          | 30.99 ± 2.54           | 31.24 ± 2.51            | 0.18            |
| n-3/n-6                  | 0.32 ± 0.08           | 0.26 ± 0.09            | 0.25 ± 0.09             | 0.017           |
| Omega-3 index            | 7.09 ± 2.13           | 5.70 ± 1.86            | 5.56 ± 2.06             | 0.012           |
| AA/EPA                   | 5.90 ± 4.53           | 8.50 ± 4.70            | 10.10 ± 5.77            | 0.019           |
| EPA/ALA                  | 3.99 ± 2.26           | 2.69 ± 2.35            | 2.92 ± 1.87             | 0.07            |
| AA/LA                    | 0.48 ± 0.10           | 0.50 ± 0.11            | 0.53 ± 0.11             | 0.27            |
| AIFA index               | 843.05 ± 196.02       | 722.82 ± 177.67        | 712.295 ± 199.87        | 0.024           |
| DNL index                | 1.28 ± 0.23           | 1.26 ± 0.19            | 1.28 ± 0.26             | 0.86            |
| Elongase C18:0/C16:0     | 0.51 ± 0.05           | 0.51 ± 0.06            | 0.50 ± 0.05             | 0.92            |
| Desaturase D5n-6         | 8.31 ± 4.15           | 7.06 ± 2.33            | 7.01 ± 1.46             | 0.22            |
| C14:0 (wt%)              | 0.93 ± 0.42           | 0.83 ± 0.32            | 0.82 ± 0.39             | 0.46            |
| C15:0 (wt%)              | 0.28 ± 0.08           | 0.22 ± 0.10            | 0.23 ± 0.09             | 0.06            |
| C16:0 (wt%)              | 23.87 ± 1.75          | 23.55 ± 1.35           | 23.50 ± 1.98            | 0.67            |

|                        |               |               |              |       |
|------------------------|---------------|---------------|--------------|-------|
| C16:1 (wt%)            | 1.51 ± 0.48   | 1.68 ± 0.59   | 1.72 ± 0.63  | 0.40  |
| C16:3n-3 (wt%)         | 0.37 ± 0.13   | 0.32 ± 0.11   | 0.33 ± 0.12  | 0.24  |
| C17:0 (wt%)            | 0.25 ± 0.11   | 0.29 ± 0.13   | 0.30 ± 0.16  | 0.43  |
| C18:0 (wt%)            | 12.03 ± 0.98  | 11.91 ± 1.06  | 11.70 ± 0.72 | 0.59  |
| C18:1 (wt%)            | 17.37 ± 1.75  | 18.41 ± 2.56  | 18.52 ± 2.56 | 0.14  |
| C18:2n-6, LA (wt%)     | 18.93 ± 2.19  | 19.04 ± 2.17  | 18.70 ± 1.84 | 0.88  |
| C18:3n-3, ALA (wt%)    | 0.61 ± 0.23   | 0.64 ± 0.24   | 0.55 ± 0.27  | 0.46  |
| C18:4n-3 (wt%)         | 0.15 ± 0.08   | 0.14 ± 0.07   | 0.10 ± 0.10  | 0.21  |
| C20:0 (wt%)            | 0.23 ± 0.07   | 0.26 ± 0.09   | 0.23 ± 0.08  | 0.22  |
| C20:1 (wt%)            | 0.20 ± 0.08   | 0.18 ± 0.05   | 0.17 ± 0.05  | 0.32  |
| C20:2n-6 (wt%)         | 0.32 ± 0.13   | 0.32 ± 0.09   | 0.36 ± 0.16  | 0.56  |
| C20:3n-6, DGLA (wt%)   | 1.20 ± 0.37   | 1.40 ± 0.28   | 1.44 ± 0.28  | 0.018 |
| C20:4n-6, AA (wt%)     | 8.86 ± 1.25   | 9.35 ± 1.45   | 9.82 ± 1.61  | 0.10  |
| C20:4n-3 (wt%)         | 0.01 ± 0.02   | 0.01 ± 0.05   | 0.03 ± 0.06  | 0.34  |
| C20:5n-3, EPA (wt%)    | 2.20 ± 1.12   | 1.49 ± 1.12   | 1.39 ± 0.92  | 0.019 |
| C22:0 (wt%)            | 0.36 ± 0.07   | 0.34 ± 0.07   | 0.39 ± 0.09  | 0.10  |
| C22:4n-6, AdA (wt%)    | 0.68 ± 0.21   | 0.86 ± 0.32   | 0.87 ± 0.31  | 0.024 |
| C22:5n-6 (wt%)         | 0.01 ± 0.05   | 0.03 ± 0.09   | 0.06 ± 0.13  | 0.33  |
| C22:5n-3, DPA (wt%)    | 1.25 ± 0.19   | 1.17 ± 0.21   | 1.19 ± 0.27  | 0.38  |
| C22:6n-3, DHA (wt%)    | 4.90 ± 1.13   | 4.21 ± 0.89   | 4.17 ± 1.18  | 0.020 |
| C24:1n-9 (wt%)         | 0.75 ± 0.18   | 0.73 ± 0.15   | 0.71 ± 0.15  | 0.72  |
| <i>Lipids</i>          |               |               |              |       |
| TC (mmol/L)            | 5.50 ± 1.08   | 5.46 ± 1.39   | 5.66 ± 1.13  | 0.87  |
| TG (mmol/L)            | 1.02 ± 0.40   | 1.39 ± 1.08   | 1.12 ± 0.62  | 0.18  |
| HDL-C (mmol/L)         | 1.78 ± 0.46   | 1.58 ± 0.55   | 1.48 ± 0.34  | 0.11  |
| LDL-C (mmol/L)         | 3.23 ± 0.82   | 3.20 ± 0.99   | 3.63 ± 0.99  | 0.33  |
| PL (mmol/L)            | 3.04 ± 0.46   | 3.05 ± 0.67   | 3.02 ± 0.44  | 0.99  |
| NEFA (mmol/L)          | 0.50 ± 0.20   | 0.50 ± 0.33   | 0.53 ± 0.21  | 0.96  |
| HDL-C/LDL-C ratio      | 0.59 ± 0.21   | 0.55 ± 0.27   | 0.44 ± 0.16  | 0.16  |
| Non HDL-C (mmol/L)     | 3.72 ± 0.91   | 3.87 ± 1.34   | 4.18 ± 1.10  | 0.47  |
| Castelli`s risk index  | 3.22 ± 0.77   | 3.83 ± 1.71   | 4.00 ± 1.15  | 0.10  |
| Atherogenic index      | -0.26 ± 0.24  | -0.12 ± 0.34  | -0.16 ± 0.31 | 0.16  |
| <i>Metabolites</i>     |               |               |              |       |
| Betaine (µM)           | 40.30 ± 14.31 | 41.86 ± 25.41 | 36.51 ± 9.55 | 0.69  |
| Choline (µM)           | 10.19 ± 2.41  | 11.21 ± 2.64  | 10.67 ± 1.95 | 0.26  |
| L-carnitine (µM)       | 34.61 ± 8.00  | 37.85 ± 7.56  | 37.95 ± 9.09 | 0.22  |
| GBB (µM)               | 0.90 ± 0.26   | 0.95 ± 0.19   | 0.81 ± 0.14  | 0.14  |
| TML (µM)               | 0.49 ± 0.17   | 0.51 ± 0.20   | 0.46 ± 0.15  | 0.62  |
| TMAO (µM)              | 8.90 ± 11.69  | 5.96 ± 4.35   | 3.30 ± 1.42  | 0.08  |
| Acetyl-C, AC2 (µM)     | 7.31 ± 3.37   | 7.42 ± 2.62   | 6.74 ± 2.06  | 0.75  |
| Propionyl-C, AC3 (µM)  | 0.34 ± 0.09   | 0.40 ± 0.11   | 0.36 ± 0.13  | 0.06  |
| Valeryl-C, AC5 (µM)    | 0.11 ± 0.04   | 0.12 ± 0.06   | 0.41 ± 1.15  | 0.12  |
| Octanoyl-C, AC8 (µM)   | 0.13 ± 0.06   | 0.14 ± 0.06   | 0.13 ± 0.04  | 0.61  |
| Lauroyl-C, AC12 (µM)   | 0.06 ± 0.03   | 0.06 ± 0.03   | 0.05 ± 0.02  | 0.29  |
| Myristoyl-C, AC14 (µM) | 0.03 ± 0.01   | 0.03 ± 0.01   | 0.02 ± 0.01  | 0.39  |
| Palmitoyl-C, AC16 (µM) | 0.10 ± 0.02   | 0.11 ± 0.04   | 0.10 ± 0.02  | 0.45  |

|           |                |                |                 |      |
|-----------|----------------|----------------|-----------------|------|
| AC2 /AC8  | 61.09 ± 22.95  | 55.27 ± 16.76  | 57.08 ± 22.05   | 0.52 |
| AC2 /AC12 | 140.86 ± 56.75 | 131.35 ± 42.83 | 151.79 ± 68.13  | 0.46 |
| AC2 /AC14 | 280.09 ± 86.51 | 281.74 ± 84.27 | 295.82 ± 100.56 | 0.85 |
| AC2 /AC16 | 71.84 ± 25.32  | 68.51 ± 15.31  | 66.49 ± 18.25   | 0.68 |
| AC3 /AC16 | 3.48 ± 1.20    | 4.02 ± 1.52    | 3.60 ± 1.14     | 0.26 |

Data represent mean ± SD, standard deviation of observed values. Age, age in years at the time of clinical examination; BMI, body mass index; PD, probing depth; CAL, clinical attachment level; BoP, bleeding on probing; PI, plaque index; RA debut, age when diagnosed with RA; DAS28, RA disease activity score; VAS, patient global health assessment score on a visual analogue scale; MHAQ, modified health assessment questionnaire; RF, rheumatoid factor; CRP, C-reactive protein; ESR, erythrocyte sedimentation rate; SFA, saturated FA; MUFA, monounsaturated FA; PUFA, polyunsaturated FA; n-3 PUFA, sum of PUFA n-3; n-6 PUFA, sum of PUFA n-6; Omega-3 index, sum of wt% EPA, eicosapentaenoic acid, and wt% DHA, docosahexaenoic acid; AA, arachidonic acid; ALA, alpha-linolenic acid; LA, linoleic acid; AIFA index, anti-inflammatory fatty acid index; DNL index, de novo lipogenesis index; DGLA, dihomo-gamma-linolenic acid; AdA, adrenic acid; DPA, docosapentaenoic acid; TC, total cholesterol; TG, triglyceride; HDL-C, high-density lipoprotein cholesterol; LDL-C, low-density lipoprotein cholesterol; PL, phospholipid; NEFA, non-esterified FA; Castelli's risk index, ratio TC/HDL-C; Atherogenic index, log<sub>10</sub>(TG/HDL-C); GBB,  $\gamma$ -butyrobetaine; TML, trimethyl lysine; TMAO, trimethylamine N-oxide; Acetyl-C, Acetyl-Carnitine. Analysed with one-way ANOVA: *P*-level <0.05. † n = 74

**Supplementary Table S7.** Distribution of demographic, behavioral and clinical continuous variables including lipid-, metabolite- and fatty acid (FA) concentrations in rheumatoid arthritis (RA) patients ( $N = 78$ ) grouped by trimethylamine N-oxide (TMAO) percentiles.

| Variables                | TMAO percentiles                           |                                            | P-value |
|--------------------------|--------------------------------------------|--------------------------------------------|---------|
|                          | 1 <sup>st</sup> percentile<br>( $N = 39$ ) | 2 <sup>nd</sup> percentile<br>( $N = 39$ ) |         |
| Age (years)              | 55 ± 12                                    | 59 ± 11                                    | 0.07    |
| BMI (kg/m <sup>2</sup> ) | 26 ± 5                                     | 26 ± 4                                     | 0.66    |
| <i>Oral data</i>         |                                            |                                            |         |
| Number of teeth          | 25 ± 4                                     | 24 ± 6                                     | 0.24    |
| PD (mm)                  | 2.7 ± 0.3                                  | 2.8 ± 0.5                                  | 0.06    |
| CAL (mm)                 | 2.9 ± 0.5                                  | 3.2 ± 1.0                                  | 0.11    |
| BoP (%)                  | 30 ± 14                                    | 33 ± 18                                    | 0.39    |
| PI (%)                   | 30 ± 11                                    | 36 ± 20                                    | 0.14    |
| <i>RA data</i>           |                                            |                                            |         |
| RA debut (age)           | 42 ± 13                                    | 45 ± 15                                    | 0.35    |
| RA duration (years)      | 14 ± 12                                    | 15 ± 11                                    | 0.71    |
| DAS28 (score)            | 2.9 ± 0.9                                  | 3.1 ± 1.3                                  | 0.39    |
| VAS (score)              | 27 ± 19                                    | 29 ± 22                                    | 0.64    |
| MHAQ (score)             | 0.38 ± 0.39                                | 0.36 ± 0.37                                | 0.80    |
| <i>Laboratory data</i>   |                                            |                                            |         |
| RF (IU/ml) †             | 249 ± 500                                  | 121 ± 218                                  | 0.15    |
| CRP (mg/L)               | 6 ± 8                                      | 11 ± 17                                    | 0.07    |
| ESR (mm/hr)              | 17 ± 14                                    | 23 ± 17                                    | 0.07    |
| <i>FA data</i>           |                                            |                                            |         |
| Total FA (mg)            | 3.17 ± 0.62                                | 3.07 ± 0.45                                | 0.41    |
| SFA (wt%)                | 37.66 ± 1.70                               | 37.45 ± 2.18                               | 0.65    |
| MUFA (wt%)               | 21.15 ± 2.75                               | 20.02 ± 2.35                               | 0.05    |
| PUFA (wt%)               | 38.44 ± 2.62                               | 39.88 ± 2.08                               | 0.009   |
| Unidentified FA (wt%)    | 2.76 ± 0.64                                | 2.65 ± 0.64                                | 0.45    |
| n-3 PUFA (wt%)           | 8.06 ± 2.29                                | 8.92 ± 2.15                                | 0.09    |
| n-6 PUFA (wt%)           | 30.38 ± 2.87                               | 30.96 ± 2.04                               | 0.31    |
| n-3/n-6                  | 0.27 ± 0.10                                | 0.29 ± 0.08                                | 0.33    |
| Omega-3 index            | 5.79 ± 2.14                                | 6.60 ± 5.96                                | 0.09    |
| AA/EPA                   | 8.98 ± 5.61                                | 6.66 ± 4.14                                | 0.041   |
| EPA/ALA                  | 3.01 ± 2.53                                | 3.43 ± 2.04                                | 0.42    |
| AA/LA                    | 0.52 ± 0.11                                | 0.48 ± 0.09                                | 0.10    |
| AIFA index               | 728.82 ± 201.49                            | 802.44 ± 184.81                            | 0.10    |
| DNL index                | 1.30 ± 0.23                                | 1.24 ± 0.19                                | 0.16    |
| Elongase C18:0/C16:0     | 0.51 ± 0.05                                | 0.50 ± 0.05                                | 0.34    |
| Desaturase D5n-6         | 7.25 ± 2.32                                | 7.78 ± 3.67                                | 0.45    |
| C14:0 (wt%)              | 0.89 ± 0.38                                | 0.84 ± 0.36                                | 0.60    |
| C15:0 (wt%)              | 0.24 ± 0.10                                | 0.25 ± 0.10                                | 0.43    |
| C16:0 (wt%)              | 23.62 ± 1.58                               | 23.70 ± 1.67                               | 0.84    |
| C16:1 (wt%)              | 1.69 ± 0.61                                | 1.57 ± 0.50                                | 0.33    |

|                        |                |                |        |
|------------------------|----------------|----------------|--------|
| C16:3n-3 (wt%)         | 0.34 ± 0.12    | 0.34 ± 0.12    | 0.89   |
| C17:0 (wt%)            | 0.29 ± 0.14    | 0.27 ± 0.11    | 0.59   |
| C18:0 (wt%)            | 12.02 ± 0.89   | 11.81 ± 1.04   | 0.34   |
| C18:1 (wt%)            | 18.57 ± 2.45   | 17.52 ± 2.08   | 0.046  |
| C18:2n-6, LA (wt%)     | 18.46 ± 2.24   | 19.41 ± 1.86   | 0.046  |
| C18:3n-3, ALA (wt%)    | 0.60 ± 0.22    | 0.63 ± 0.26    | 0.53   |
| C18:4n-3 (wt%)         | 0.13 ± 0.08    | 0.13 ± 0.09    | 0.93   |
| C20:0 (wt%)            | 0.24 ± 0.08    | 0.25 ± 0.09    | 0.68   |
| C20:1 (wt%)            | 0.18 ± 0.06    | 0.19 ± 0.06    | 0.28   |
| C20:2n-6 (wt%)         | 0.32 ± 0.14    | 0.33 ± 0.10    | 0.82   |
| C20:3n-6, DGLA (wt%)   | 1.37 ± 0.33    | 1.29 ± 0.33    | 0.28   |
| C20:4n-6, AA (wt%)     | 9.37 ± 1.62    | 9.14 ± 1.23    | 0.48   |
| C20:4n-3 (wt%)         | 0.01 ± 0.04    | 0.01 ± 0.05    | 0.77   |
| C20:5n-3, EPA (wt%)    | 1.56 ± 1.15    | 1.91 ± 1.10    | 0.17   |
| C22:0 (wt%)            | 0.37 ± 0.07    | 0.34 ± 0.07    | 0.07   |
| C22:4n-6, AdA (wt%)    | 0.82 ± 0.34    | 0.76 ± 0.24    | 0.37   |
| C22:5n-6 (wt%)         | 0.03 ± 0.08    | 0.03 ± 0.09    | 0.84   |
| C22:5n-3, DPA (wt%)    | 1.20 ± 0.24    | 1.21 ± 0.19    | 0.93   |
| C22:6n-3, DHA (wt%)    | 4.23 ± 1.14    | 4.69 ± 0.98    | 0.06   |
| C24:1n-9 (wt%)         | 0.72 ± 0.18    | 0.74 ± 0.15    | 0.57   |
| <i>Lipids</i>          |                |                |        |
| TG (mmol/L)            | 1.30 ± 1.00    | 1.10 ± 0.58    | 0.28   |
| TC (mmol/L)            | 5.56 ± 1.37    | 5.46 ± 1.06    | 0.72   |
| HDL-C (mmol/L)         | 1.61 ± 0.48    | 1.67 ± 0.51    | 0.57   |
| LDL-C (mmol/L)         | 3.33 ± 0.97    | 3.25 ± 0.90    | 0.73   |
| PL (mmol/L)            | 3.09 ± 0.63    | 2.99 ± 0.47    | 0.40   |
| NEFA (mmol/L)          | 0.55 ± 0.33    | 0.46 ± 0.18    | 0.15   |
| HDL-C/LDL-C ratio      | 0.52 ± 0.22    | 0.56 ± 0.25    | 0.46   |
| Non HDL-C (mmol/L)     | 3.95 ± 1.25    | 3.79 ± 1.06    | 0.53   |
| Castelli`s risk index  | 3.76 ± 1.56    | 3.51 ± 1.12    | 0.43   |
| Atherogenic index      | -0.14 ± 0.32   | -0.21 ± 0.29   | 0.31   |
| <i>Metabolites</i>     |                |                |        |
| Betaine (μM)           | 37.51 ± 11.89  | 43.13 ± 24.46  | 0.20   |
| Choline (μM)           | 10.38 ± 2.24   | 11.09 ± 2.65   | 0.20   |
| L-carnitine (μM)       | 36.19 ± 6.95   | 37.13 ± 9.11   | 0.61   |
| GBB (μM)               | 0.84 ± 0.19    | 0.97 ± 0.23    | 0.011  |
| TML (μM)               | 0.43 ± 0.13    | 0.56 ± 0.20    | <0.001 |
| TMAO (μM)              | 2.61 ± 0.89    | 10.53 ± 9.68   | <0.001 |
| Acetyl-C, AC2 (μM)     | 7.30 ± 3.28    | 7.21 ± 2.31    | 0.89   |
| Propionyl-C, AC3 (μM)  | 0.35 ± 0.09    | 0.39 ± 0.12    | 0.15   |
| Valeryl-C, AC5 (μM)    | 0.23 ± 0.69    | 0.12 ± 0.04    | 0.33   |
| Octanoyl-C, AC8 (μM)   | 0.14 ± 0.06    | 0.13 ± 0.05    | 0.41   |
| Lauroyl-C, AC12 (μM)   | 0.06 ± 0.03    | 0.06 ± 0.03    | 0.41   |
| Myristoyl-C, AC14 (μM) | 0.03 ± 0.01    | 0.03 ± 0.01    | 0.98   |
| Palmitoyl-C, AC16 (μM) | 0.10 ± 0.03    | 0.11 ± 0.03    | 0.68   |
| AC2 /AC8               | 56.73 ± 23.21  | 58.79 ± 16.72  | 0.66   |
| AC2 /AC12              | 130.20 ± 48.34 | 146.92 ± 56.91 | 0.17   |
| AC2 /AC14              | 278.47 ± 82.14 | 288.84 ± 92.70 | 0.60   |

|           |               |               |      |
|-----------|---------------|---------------|------|
| AC2 /AC16 | 69.57 ± 20.29 | 69.19 ± 19.81 | 0.93 |
| AC3 /AC16 | 3.62 ± 1.24   | 3.87 ± 1.46   | 0.42 |

Data represent mean ± SD, standard deviation of observed values. TMAO percentiles, TMAO values categorized into lowest (median 2.66, range 0.67 – 4.21) and highest percentile (median 6.84, range 4.29 – 44.28); Age, age in years at the time of clinical examination; BMI, body mass index; PD, probing depth; CAL, clinical attachment level; BoP, bleeding on probing; PI, plaque index; RA debut, age when diagnosed with RA; DAS28, RA disease activity score; VAS, patient global health assessment score on a visual analogue scale; MHAQ, modified health assessment questionnaire; RF, rheumatoid factor; CRP, C-reactive protein; ESR, erythrocyte sedimentation rate; SFA, saturated FA; MUFA, monounsaturated FA; PUFA, polyunsaturated FA; n-3 PUFA, sum of n-3 PUFA; n-6 PUFA, sum of n-6 PUFA; Omega-3 index, sum of wt% EPA, eicosapentaenoic acid, and wt% DHA, docosahexaenoic acid; AA, arachidonic acid; ALA, alpha-linolenic acid; LA, linoleic acid; AIFA index, anti-inflammatory fatty acid index; DNL index, de novo lipogenesis index; DGLA, dihomo-gamma-linolenic acid; AdA, adrenic acid, DPA, docosapentaenoic acid; TG, triglyceride; TC, total cholesterol; HDL-C, high-density lipoprotein cholesterol; LDL-C, low-density lipoprotein cholesterol; PL, phospholipid; NEFA, non-esterified FA; Castelli's risk index, TC/HDL-C; Atherogenic index, log<sub>10</sub>(TG/HDL-C); GBB, γ-butyrobetaine; TML, trimethyl lysine; TMAO, trimethylamine N-oxide; Acetyl-C (AC2), Acetyl-Carnitine. Analysed with Student t-test: *P*-level <0.05. † n = 74



**Supplementary Table S8.** Distribution of demographic, behavioral and clinical continuous variables including lipid-, metabolite- and fatty acid (FA) concentrations in rheumatoid arthritis (RA) patients ( $N = 78$ ) grouped by Omega-3 index tertiles.

| Variables                | Omega-3 tertiles                        |                                         |                                         | <i>P</i> -value |
|--------------------------|-----------------------------------------|-----------------------------------------|-----------------------------------------|-----------------|
|                          | 1 <sup>st</sup> Tertile<br>( $N = 26$ ) | 2 <sup>nd</sup> Tertile<br>( $N = 26$ ) | 3 <sup>rd</sup> Tertile<br>( $N = 26$ ) |                 |
| Age (years)              | 51 ± 12                                 | 60 ± 10                                 | 61 ± 10                                 | 0.001           |
| BMI (kg/m <sup>2</sup> ) | 27 ± 4                                  | 27 ± 5                                  | 24 ± 3                                  | 0.020           |
| <i>Oral data</i>         |                                         |                                         |                                         |                 |
| Number of teeth          | 26 ± 3                                  | 23 ± 6                                  | 25 ± 5                                  | 0.08            |
| PD (mm)                  | 2.8 ± 0.3                               | 2.9 ± 0.5                               | 2.7 ± 0.3                               | 0.26            |
| CAL (mm)                 | 2.9 ± 0.5                               | 3.3 ± 1.1                               | 2.9 ± 0.4                               | 0.13            |
| BoP (%)                  | 35 ± 16                                 | 32 ± 14                                 | 27 ± 16                                 | 0.20            |
| PI (%)                   | 32 ± 11                                 | 36 ± 23                                 | 30 ± 13                                 | 0.33            |
| <i>RA data</i>           |                                         |                                         |                                         |                 |
| RA debut (age)           | 38 ± 12                                 | 49 ± 12                                 | 43 ± 17                                 | 0.019           |
| RA duration (years)      | 14 ± 9                                  | 12 ± 10                                 | 19 ± 13                                 | 0.07            |
| DAS28 (score)            | 3.0 ± 0.8                               | 2.9 ± 1.3                               | 3.1 ± 1.2                               | 0.92            |
| VAS (score)              | 35 ± 18                                 | 22 ± 22                                 | 26 ± 21                                 | 0.06            |
| MHAQ (score)             | 0.44 ± 0.39                             | 0.32 ± 0.39                             | 0.35 ± 0.36                             | 0.54            |
| <i>Laboratory data</i>   |                                         |                                         |                                         |                 |
| RF (IU/ml) †             | 206 ± 411                               | 172 ± 408                               | 170 ± 342                               | 0.93            |
| CRP (mg/L)               | 7 ± 10                                  | 9 ± 13                                  | 10 ± 17                                 | 0.58            |
| ESR (mm/hr)              | 15 ± 12                                 | 21 ± 17                                 | 23 ± 17                                 | 0.09            |
| <i>FA data</i>           |                                         |                                         |                                         |                 |
| Total FA (mg)            | 3.19 ± 0.63                             | 3.18 ± 0.51                             | 2.99 ± 0.47                             | 0.32            |
| SFA (wt%)                | 37.51 ± 1.79                            | 38.11 ± 2.02                            | 37.40 ± 1.96                            | 0.18            |
| MUFA (wt%)               | 22.16 ± 2.64                            | 20.35 ± 2.36                            | 19.25 ± 1.96                            | <0.001          |
| PUFA (wt%)               | 38.10 ± 2.17                            | 38.79 ± 2.09                            | 40.58 ± 2.49                            | <0.001          |
| Unidentified FA (wt%)    | 2.59 ± 0.71                             | 2.75 ± 0.57                             | 2.77 ± 0.64                             | 0.55            |
| n-3 PUFA (wt%)           | 6.31 ± 0.83                             | 8.15 ± 0.61                             | 11.01 ± 1.67                            | <0.001          |
| n-6 PUFA (wt%)           | 31.79 ± 2.05                            | 30.64 ± 2.48                            | 29.56 ± 2.48                            | 0.004           |
| n-3/n-6                  | 0.20 ± 0.03                             | 0.27 ± 0.04                             | 0.38 ± 0.08                             | <0.001          |
| Omega-3 index            | 4.13 ± 0.55                             | 5.89 ± 0.57                             | 8.56 ± 1.58                             | <0.001          |
| AA/EPA                   | 12.94 ± 4.50                            | 7.16 ± 2.68                             | 3.36 ± 1.48                             | <0.001          |
| EPA/ALA                  | 1.60 ± 0.95                             | 2.94 ± 1.51                             | 5.12 ± 2.53                             | <0.001          |
| AA/LA                    | 0.51 ± 0.10                             | 0.52 ± 0.11                             | 0.46 ± 0.10                             | 0.14            |
| AIFA index               | 571.25 ± 57.06                          | 740.64 ± 63.20                          | 985.01 ± 143.54                         | <0.001          |
| DNL index                | 1.23 ± 0.18                             | 1.32 ± 0.24                             | 1.27 ± 0.21                             | 0.31            |
| Elongase C18:0/C16:0     | 0.51 ± 0.05                             | 0.51 ± 0.06                             | 0.51 ± 0.05                             | 0.88            |
| Desaturase D5n-6         | 6.79 ± 1.60                             | 7.13 ± 1.97                             | 8.63 ± 4.52                             | 0.07            |
| C14:0 (wt%)              | 0.94 ± 0.44                             | 0.87 ± 0.37                             | 0.78 ± 0.27                             | 0.26            |

|                       |               |               |               |        |
|-----------------------|---------------|---------------|---------------|--------|
| C15:0 (wt%)           | 0.23 ± 0.10   | 0.22 ± 0.08   | 0.28 ± 0.10   | 0.08   |
| C16:0 (wt%)           | 23.41 ± 1.52  | 24.03 ± 1.83  | 23.54 ± 1.46  | 0.35   |
| C16:1 (wt%)           | 1.81 ± 0.61   | 1.60 ± 0.60   | 1.46 ± 0.40   | 0.07   |
| C16:3n-3 (wt%)        | 0.34 ± 0.11   | 0.32 ± 0.10   | 0.35 ± 0.13   | 0.69   |
| C17:0 (wt%)           | 0.28 ± 0.13   | 0.28 ± 0.13   | 0.27 ± 0.13   | 0.95   |
| C18:0 (wt%)           | 11.69 ± 0.92  | 12.13 ± 1.04  | 11.93 ± 0.94  | 0.26   |
| C18:1 (wt%)           | 19.51 ± 2.28  | 17.88 ± 2.07  | 16.75 ± 1.76  | <0.001 |
| C18:2n-6, LA (wt%)    | 19.31 ± 1.89  | 18.60 ± 2.18  | 18.91 ± 2.22  | 0.48   |
| C18:3n-3, ALA (wt%)   | 0.61 ± 0.28   | 0.59 ± 0.24   | 0.64 ± 0.21   | 0.76   |
| C18:4n-3 (wt%)        | 0.15 ± 0.08   | 0.13 ± 0.08   | 0.21 ± 0.09   | 0.49   |
| C20:0 (wt%)           | 0.24 ± 0.08   | 0.24 ± 0.08   | 0.25 ± 0.08   | 0.82   |
| C20:1 (wt%)           | 0.17 ± 0.04   | 0.16 ± 0.05   | 0.23 ± 0.06   | <0.001 |
| C20:2n-6 (wt%)        | 0.34 ± 0.14   | 0.31 ± 0.12   | 0.32 ± 0.11   | 0.73   |
| C20:3n-6, DGLA (wt%)  | 1.47 ± 0.29   | 1.39 ± 0.28   | 1.13 ± 0.33   | <0.001 |
| C20:4n-6, AA (wt%)    | 9.63 ± 1.38   | 9.51 ± 1.45   | 8.63 ± 1.30   | 0.021  |
| C20:4n-3 (wt%)        | 0             | 0.02 ± 0.05   | 0.02 ± 0.06   | 0.30   |
| C20:5n-3, EPA (wt%)   | 0.82 ± 0.25   | 1.44 ± 0.39   | 2.94 ± 1.12   | <0.001 |
| C22:0 (wt%)           | 0.35 ± 0.08   | 0.35 ± 0.07   | 0.36 ± 0.08   | 0.82   |
| C22:4n-6, AdA (wt%)   | 1.00 ± 0.24   | 0.80 ± 0.27   | 0.57 ± 0.18   | <0.001 |
| C22:5n-6 (wt%)        | 0.05 ± 0.12   | 0.04 ± 0.09   | 0             | 0.14   |
| C22:5n-3, DPA (wt%)   | 1.08 ± 0.19   | 1.21 ± 0.16   | 1.33 ± 0.22   | <0.001 |
| C22:6n-3, DHA (wt%)   | 3.31 ± 0.46   | 4.45 ± 0.37   | 5.62 ± 0.69   | <0.001 |
| C24:1n-9 (wt%)        | 0.67 ± 0.14   | 0.71 ± 0.16   | 0.82 ± 0.16   | 0.003  |
| <i>Lipids</i>         |               |               |               |        |
| TC (mmol/L)           | 5.34 ± 1.56   | 5.59 ± 0.93   | 5.60 ± 1.12   | 0.67   |
| TG (mmol/L)           | 1.47 ± 1.14   | 1.24 ± 0.57   | 0.90 ± 0.52   | 0.037  |
| HDL-C (mmol/L)        | 1.44 ± 0.39   | 1.57 ± 0.54   | 1.92 ± 0.43   | <0.001 |
| LDL-C (mmol/L)        | 3.24 ± 1.16   | 3.40 ± 0.71   | 3.23 ± 0.90   | 0.77   |
| PL (mmol/L)           | 3.01 ± 0.72   | 3.07 ± 0.43   | 3.05 ± 0.49   | 0.92   |
| NEFA (mmol/L)         | 0.52 ± 0.36   | 0.48 ± 0.20   | 0.52 ± 0.21   | 0.81   |
| HDL-C/LDL-C ratio     | 0.51 ± 0.24   | 0.48 ± 0.20   | 0.64 ± 0.25   | 0.025  |
| Non HDL-C (mmol/L)    | 3.91 ± 1.51   | 4.03 ± 0.81   | 3.68 ± 1.05   | 0.55   |
| Castelli`s risk index | 3.86 ± 1.16   | 4.02 ± 1.78   | 3.02 ± 0.74   | 0.015  |
| Atherogenic index     | -0.05 ± 0.26  | -0.11 ± 0.29  | -0.37 ± 0.27  | <0.001 |
| <i>Metabolites</i>    |               |               |               |        |
| Betaine (μM)          | 41.39 ± 14.01 | 40.80 ± 27.69 | 38.77 ± 13.44 | 0.88   |
| Choline (μM)          | 10.81 ± 2.79  | 11.57 ± 2.12  | 9.83 ± 2.20   | 0.037  |
| L-carnitine (μM)      | 38.13 ± 7.52  | 36.87 ± 8.38  | 34.98 ± 8.27  | 0.37   |
| GBB (μM)              | 0.91 ± 0.21   | 0.92 ± 0.22   | 0.90 ± 0.23   | 0.95   |
| TML (μM)              | 0.47 ± 0.14   | 0.48 ± 0.21   | 0.52 ± 0.18   | 0.63   |
| TMAO (μM)             | 4.57 ± 4.06   | 4.97 ± 2.79   | 10.18 ± 12.16 | 0.015  |
| Acetyl-C, AC2 (μM)    | 7.12 ± 2.68   | 6.91 ± 2.44   | 7.74 ± 3.31   | 0.55   |
| Propionyl-C, AC3 (μM) | 0.37 ± 0.08   | 0.38 ± 0.11   | 0.37 ± 0.13   | 0.91   |
| Valeryl-C, AC5 (μM)   | 0.12 ± 0.06   | 0.11 ± 0.04   | 0.28 ± 0.84   | 0.41   |
| Octanoyl-C, AC8 (μM)  | 0.14 ± 0.07   | 0.13 ± 0.05   | 0.14 ± 0.05   | 0.61   |
| Lauroyl-C, AC12 (μM)  | 0.06 ± 0.03   | 0.06 ± 0.03   | 0.06 ± 0.02   | 0.85   |

|                                     |                    |                    |                    |       |
|-------------------------------------|--------------------|--------------------|--------------------|-------|
| Myristoyl-C, AC14 ( $\mu\text{M}$ ) | $0.03 \pm 0.01$    | $0.03 \pm 0.01$    | $0.03 \pm 0.01$    | 0.89  |
| Palmitoyl-C, AC16 ( $\mu\text{M}$ ) | $0.11 \pm 0.03$    | $0.11 \pm 0.03$    | $0.10 \pm 0.02$    | 0.48  |
| AC2 /AC8                            | $55.41 \pm 22.06$  | $57.31 \pm 17.45$  | $60.57 \pm 21.00$  | 0.65  |
| AC2 /AC12                           | $142.01 \pm 66.52$ | $134.22 \pm 37.38$ | $139.45 \pm 53.27$ | 0.87  |
| AC2 /AC14                           | $286.60 \pm 94.42$ | $279.15 \pm 86.34$ | $285.21 \pm 83.66$ | 0.95  |
| AC2 /AC16                           | $67.36 \pm 18.01$  | $63.86 \pm 16.48$  | $76.94 \pm 23.06$  | 0.048 |
| AC3 /AC16                           | $3.73 \pm 1.13$    | $3.66 \pm 1.24$    | $3.84 \pm 1.67$    | 0.90  |

Data represent mean  $\pm$  SD, standard deviation of observed values. Omega-3 tertiles, 1<sup>st</sup> Tertile (median 4.04, range 3.03 – 4.95), 2<sup>nd</sup> Tertile (median 5.81, range 5.08 – 6.75), 3<sup>rd</sup> Tertile (median 7.66, range 6.86 – 12.62); Age, age in years at the time of clinical examination; BMI, body mass index; PD, probing depth; CAL, clinical attachment level; BoP, percentage of sites with bleeding on probing; PI, percentage of sites with dental plaque; RA debut, age when diagnosed with RA; DAS28, RA disease activity score; VAS, patient global health assessment score on a visual analogue scale; MHAQ, modified health assessment questionnaire; RF, rheumatoid factor; CRP, C-reactive protein; ESR, erythrocyte sedimentation rate; SFA, saturated FA; MUFA, monounsaturated FA; PUFA, polyunsaturated FA; n-3 PUFA, sum of n-3 PUFA; n-6 PUFA, sum of n-6 PUFA; Omega-3 index, sum of wt% EPA, eicosapentaenoic acid, and wt% DHA, docosahexaenoic acid; AA, arachidonic acid; ALA, alpha-linolenic acid; LA, linoleic acid; AIFA index, anti-inflammatory fatty acid index; DNL index, de novo lipogenesis index; DGLA, dihomo-gamma-linolenic acid; AdA, adrenic acid; DPA, docosapentaenoic acid; TC, total cholesterol; TG, triglyceride; HDL-C, high-density lipoprotein cholesterol; LDL-C, low-density lipoprotein cholesterol; PL, phospholipid; NEFA, non-esterified FA; Castelli's risk index, ratio TC/HDL-C; Atherogenic index,  $\log_{10}(\text{TG}/\text{HDL-C})$ ; GBB,  $\gamma$ -butyrobetaine; TML, trimethyl lysine; TMAO, trimethylamine N-oxide; Acetyl-C (AC2), Acetyl-Carnitine. Analysed with one-way ANOVA: *P*-level <0.05. † n = 74
